## Human T-bet governs innate and innate-like adaptive IFN- $\gamma$ immunity against mycobacteria

Rui Yang<sup>1,@</sup>, Federico Mele<sup>2,\*</sup>, Lisa Worley<sup>3,4,\*</sup>, David Langlais<sup>5,6,\*</sup>, Jérémie Rosain<sup>7,8,\*</sup>,  
Ibithal Benhsaien<sup>9,10,§</sup>, Houda Elarabi<sup>11,§</sup>, Carys A. Croft<sup>12,13,14,§</sup>, Jean-Marc Doisne<sup>12,13,§</sup>,  
Peng Zhang<sup>1,§</sup>, Marc Weisshaar<sup>15,§</sup>, David Jarrossay<sup>2,§</sup>, Daniela Latorre<sup>15</sup>, Yichao Shen<sup>1</sup>,  
Jing Han<sup>1</sup>, Conor Gruber<sup>16,17,18</sup>, Janet Markle<sup>1</sup>, Fatima Al Ali<sup>19</sup>, Mahbuba Rahman<sup>19</sup>,  
Taushif Khan<sup>19</sup>, Yoann Seeleuthner<sup>7,8</sup>, Gaspard Kerner<sup>7,8</sup>, Lucas T. Husquin<sup>20</sup>,  
Julia L. Maclsaac<sup>21</sup>, Mohamed Jeljeli<sup>22</sup>, Fatima Ailal<sup>9,10</sup>, Michael S. Kobor<sup>21</sup>,  
Carmen Oleaga-Quintas<sup>7,8</sup>, Manon Roynard<sup>7,8</sup>, Mathieu Bourgey<sup>6,23</sup>, Jamila El Baghdadi<sup>24</sup>,  
Stéphanie Boisson-Dupuis<sup>1,7,8</sup>, Anne Puel<sup>1,7,8</sup>, Frédéric Batteux<sup>22</sup>, Flore Rozenberg<sup>25</sup>,  
Nico Marr<sup>19,26</sup>, Qiang Pan-Hammarström<sup>27</sup>, Dusan Bogunovic<sup>16,17,18</sup>, Lluís Quintana-Murci<sup>20,28</sup>,  
Thomas Carroll<sup>29</sup>, Cindy S Ma<sup>3,4</sup>, Laurent Abel<sup>1,7,8,#</sup>, Aziz Bousfiha<sup>9,10,#</sup>, James P. Di Santo<sup>12,13,#</sup>,  
Laurie H Glimcher<sup>30,31,\*\*</sup>, Philippe Gros<sup>6,32\*\*</sup>, Stuart G Tangye<sup>3,4,\*\*</sup>, Federica Sallusto<sup>2,15,\*\*</sup>,  
Jacinta Bustamante<sup>1,7,8,33,##</sup> and Jean-Laurent Casanova<sup>1,7,8,34,35,##,@</sup>

<sup>1</sup>St Giles Laboratory of Human Genetics of Infectious Diseases, Rockefeller Branch, Rockefeller University, New York, NY, USA

<sup>2</sup>Center of Medical Immunology, Institute for Research in Biomedicine, Faculty of Biomedical Sciences, University of Italian Switzerland (USI), Bellinzona, Switzerland.

<sup>3</sup>Immunology Division, Garvan Institute of Medical Research, Darlinghurst, Australia

<sup>4</sup>St Vincent's Clinical School, Faculty of Medicine, UNSW Sydney, Darlinghurst, Australia

<sup>5</sup>Department of Human Genetics, Department of Microbiology and Immunology, McGill University, Montreal, QC, Canada

<sup>6</sup>McGill University Genome Center, McGill Research Centre on Complex Traits, Montreal, QC, Canada

<sup>7</sup>Laboratory of Human Genetics of Infectious Diseases, Necker Branch, INSERM UMR 1163, Necker Hospital for Sick Children, Paris, France, EU

<sup>8</sup>Paris University, Imagine Institute, Paris, France, EU

<sup>9</sup>Laboratory of Clinical Immunology, Inflammation and Allergy, Faculty of Medicine and Pharmacy of Casablanca, King Hassan II University, Casablanca, Morocco

<sup>10</sup>Clinical Immunology Unit, Department of Pediatric Infectious Diseases, Children's Hospital, CHU Averroes, Casablanca, Morocco

<sup>11</sup>Pediatrics Department, Hassan II Hospital, Dakhla, Morocco

<sup>12</sup>Innate Immunity Unit, Institut Pasteur, 75724 Paris, France, EU

<sup>13</sup>Inserm U1223, 75015 Paris, France, EU

<sup>14</sup>Université de Paris, Sorbonne Paris Cité, Paris, France, EU

<sup>15</sup>Institute of Microbiology, ETH Zurich, Switzerland

<sup>14</sup>Department of Immunology, Institut Pasteur, Paris, France, EU

<sup>16</sup>Department of Microbiology, Icahn School of Medicine at Mount Sinai, NY, USA

<sup>17</sup>Department of Pediatrics, Icahn School of Medicine at Mount Sinai, NY, USA

<sup>18</sup>The Mindich Child Health and Development Institute, Icahn School of Medicine at Mount Sinai, NY, USA

<sup>19</sup>Research Branch, Sidra Medicine, Doha, Qatar

<sup>20</sup>Unit of Human Evolutionary Genetics, CNRS UMR2000, Institut Pasteur, Paris, France, EU

- 1 <sup>21</sup>BC Children’s Hospital Research Institute, Department of Medical Genetics, University of  
2 British Columbia, Vancouver, Canada  
3 <sup>22</sup>Immunology Laboratory, Cochin Hospital, AH-HP, Paris, France, EU  
4 <sup>23</sup>Canadian Centre for Computational Genomics, Montreal, QC, Canada  
5 <sup>24</sup>Genetics Unit, Military Hospital Mohamed V, Rabat, Morocco  
6 <sup>25</sup>Virology Laboratory, Cochin Hospital, AH-HP, Paris, France, EU  
7 <sup>26</sup>College of Health and Life Sciences, Hamad Bin Khalifa University, Doha, Qatar  
8 <sup>27</sup>Department of Biosciences and Nutrition, Karolinska Institutet, Stockholm, Sweden, EU  
9 <sup>28</sup>Human Genomics and Evolution, Collège de France, Paris, France, EU  
10 <sup>29</sup>Bioinformatics Resource Center, The Rockefeller University, New York, USA  
11 <sup>30</sup>Department of Cancer Immunology and Virology, Dana-Farber Cancer Institute and Harvard  
12 Medical School, Boston, USA  
13 <sup>31</sup>Department of Medicine, Harvard Medical School and Brigham and Women’s Hospital, Boston,  
14 USA  
15 <sup>32</sup>Department of Biochemistry, McGill University, Montreal, QC, Canada.  
16 <sup>33</sup>Study Center for Primary Immunodeficiencies, AP-HP, Necker Children Hospital, Paris, France,  
17 EU  
18 <sup>34</sup>Pediatric Hematology-Immunology Unit, Necker Hospital for Sick Children, AP-HP, Paris,  
19 France, EU  
20 <sup>35</sup>Howard Hughes Medical Institute, New York, NY, USA

21  
22 §, \*, \*\*, #, ## These authors contributed equally  
23 @Correspondence: ryang@rockefeller.edu and casanova@rockefeller.edu  
24

1 **Author contributions**

2 R.Y., J.B. and J.-L.C. conceptualized the study, designed the experiments, interpreted the data,  
3 and wrote the manuscript. R.Y., G.K. and J.R. identified and validated the patient's mutation.  
4 Yoa.S., G.K. and L.A. performed genome-wide linkage analysis. R.Y. tested the mutation,  
5 performed T-bet overexpression experiments, characterized the T-bet function in patient-derived  
6 cell lines and primary cells, performed T-bet complementation in CD4<sup>+</sup> T cells, RNA-seq  
7 experiments, and omni-ATAC-seq experiments, *ex vivo* and *in vitro* activation experiments.  
8 Dav.L., M.B. and P.G. performed scRNA-seq experiments and analyzed the data. L.W., C.S.M.  
9 and S.G.T. performed immunophenotyping of PBMCs and CD4<sup>+</sup> T cell *ex vivo* stimulation and *in*  
10 *vitro* differentiation, and analyzed the data. R.Y. and P.Z. analyzed RNA-seq data. R.Y., J.L.M.,  
11 M.S.K., P.Z., L.T.H., and L.Q.M. performed and analyzed Epic-DNA methylation array analyses.  
12 M.J., F.B., and F.R. performed clinical serological tests. R.Y., F.M., D.J., M.W., Dan.L., and F.S.  
13 performed and analyzed memory CD4<sup>+</sup> T-cell libraries. C.A.C., J.-M.D., and J.P.D. performed and  
14 analyzed immunophenotyping for NK cell and ILCs by flow cytometry. H.E., I.B., F.A., A.B. and  
15 J.B. took care of the patient. J.E.B. contributed North African exomes to our in-house database.  
16 R.Y., J.M., and Yic.S. designed and generated mutant T-bet plasmids. R.Y. and J.H. performed  
17 and analyzed live BCG stimulation of PBMC experiments and Vδ2<sup>+</sup> γδ T expansion experiments.  
18 R.Y., C.G., and D.B. performed and analyzed CyTOF mass cytometry experiments. F.A.A.,  
19 Mah.R., T.K., and N.M. performed and analyzed the phage immunoprecipitation-sequencing  
20 experiments. C.O.-Q., Man.R., R.Y., and J.B. prepared DNA, plasma and PBMCs from the patient,  
21 his family and healthy donors. T.C. and R.Y. analyzed omni-ATAC-seq data. S.B.-D., A.P.,  
22 Q,P.-H, L.H.G., P.G., S.G.T., F.S., J. B., and J.-L.C. supervised the study and made significant  
23 intellectual contributions. All authors provided input on the final manuscript.

## 1           **Summary**

2           Inborn errors of human IFN- $\gamma$  immunity underlie mycobacterial disease. We report a  
3 patient with mycobacterial disease due to an inherited deficiency of the transcription factor T-bet.  
4 This deficiency abolishes the expression of T-bet target genes, including *IFNG*, by altering  
5 chromatin accessibility and DNA methylation in CD4<sup>+</sup> T cells. The patient has profoundly  
6 diminished counts of mycobacterial-reactive circulating NK, invariant NKT (iNKT), mucosal-  
7 associated invariant T (MAIT), and V $\delta$ 2<sup>+</sup>  $\gamma\delta$  T lymphocytes, and of non-mycobacterial-reactive  
8 classic T<sub>H</sub>1 lymphocytes, the remainders of which also produce abnormally low amounts of IFN-  
9  $\gamma$ . Other IFN- $\gamma$ -producing lymphocyte subsets however develop normally, but with low levels of  
10 IFN- $\gamma$  production, with exception of V $\delta$ 2<sup>-</sup>  $\gamma\delta$  T lymphocytes, which produce normal amounts of  
11 IFN- $\gamma$  in response to non-mycobacterial stimulation, and non-classic T<sub>H</sub>1 (T<sub>H</sub>1\*) lymphocytes,  
12 which produce IFN- $\gamma$  normally in response to mycobacterial antigens. Human T-bet deficiency  
13 thus underlies mycobacterial disease by preventing the development of, and IFN- $\gamma$  production by,  
14 innate (NK) and innate-like adaptive lymphocytes (iNKT, MAIT, and V $\delta$ 2<sup>+</sup>  $\gamma\delta$  T cells), with  
15 mycobacterial-specific, IFN- $\gamma$ -producing, purely adaptive  $\alpha\beta$  T<sub>H</sub>1\* cells unable to compensate for  
16 this deficit.

## 1           **Introduction**

2           In the course of primary infection, life-threatening disease in otherwise healthy children,  
3 adolescents, and even adults, can result from monogenic inborn errors of immunity, which display  
4 genetic heterogeneity and physiological homogeneity (Casanova, 2015b, 2015a). Mendelian  
5 susceptibility to mycobacterial disease (MSMD) is characterized by a selective, inherited  
6 predisposition to clinical disease caused by weakly virulent mycobacteria, such as *Mycobacterium*  
7 *bovis* Bacille Calmette-Guérin (BCG) vaccines and environmental mycobacteria (Rosain et al.,  
8 2019). Patients are also vulnerable to *bona fide* tuberculosis. Patients with typical, “isolated”  
9 MSMD are rarely prone to other infectious agents, with the exception of *Salmonella* and  
10 occasionally other intra-macrophagic bacteria, fungi, and parasites (Bustamante et al., 2014;  
11 Rosain et al., 2019). Patients with atypical, “syndromic” MSMD often display other clinical  
12 phenotypes, infectious or otherwise. MSMD, both “isolated” and “syndromic”, displays a high  
13 level of genetic heterogeneity, with causal mutations in 15 genes, and additional allelic  
14 heterogeneity, resulting in 30 different disorders (**Table S1**). However, there is also physiological  
15 homogeneity, as all known genetic causes of MSMD affect IFN- $\gamma$ -dependent immunity (Boisson-  
16 Dupuis et al., 2018; Bustamante et al., 2014; Kong et al., 2018; Martínez-Barricarte et al., 2018;  
17 Rosain et al., 2019). Mutations of *IL12B*, *IL12RB1*, *IL12RB2*, *IL23R*, *TYK2*, *ISG15*, *RORC*,  
18 *IKBKG* (NEMO), *IRF8*, and *SPPL2A* impede IFN- $\gamma$  production by innate and adaptive immune  
19 cells, whereas mutations of *IFNGR1*, *IFNGR2*, *STAT1*, *JAK1*, and *CYBB* impair cellular responses  
20 to IFN- $\gamma$  (**Fig. S1A**). The clinical penetrance and severity of MSMD depend strongly on genetic  
21 etiology and they increase with decreasing levels of IFN- $\gamma$  activity (Dupuis et al., 2000). Four  
22 etiologies also result in an impairment of immunological circuits other than the IFN- $\gamma$  circuit,  
23 accounting for “syndromic” MSMD in the corresponding patients (Rosain et al., 2019).

1 Collectively, these studies revealed the crucial role of human IFN- $\gamma$  in antimycobacterial immunity  
2 and its redundancy for immunity against many other pathogens.

3 The cellular basis of MSMD in patients with impaired responses to IFN- $\gamma$  involves  
4 mononuclear phagocytes. The ability of these cells to contain the ingested mycobacteria depends  
5 on their activation by IFN- $\gamma$  (Nathan et al., 1983). The cellular basis of MSMD in patients with  
6 impaired IFN- $\gamma$  production is poorly understood, as most types of lymphocytes can produce IFN-  
7  $\gamma$  (Wilson and Schoenborn, 2007). Some genetic etiologies of MSMD affect some lymphocyte  
8 subsets more than others. ISG15 deficiency preferentially impairs the production of IFN- $\gamma$  by NK  
9 cells (Bogunovic et al., 2012; Zhang et al., 2015). IL-12R $\beta$ 2 deficiency preferentially impairs the  
10 production of IFN- $\gamma$  by NK, B,  $\gamma\delta$  T, classic  $\alpha\beta$  T cells, ILC1, and ILC2 cells, whereas IL-23R  
11 deficiency preferentially impairs that by invariant NKT (iNKT) and mucosal-associated invariant  
12 T (MAIT) cells, and both IL-12R $\beta$ 1 and TYK2 deficiencies impair both the IL-12- and IL-23-  
13 dependent subsets (Boisson-Dupuis et al., 2018; Martínez-Barricarte et al., 2018). SPPL2a and  
14 IRF8 deficiencies selectively impair the production of IFN- $\gamma$  by CD4<sup>+</sup> CCR6<sup>+</sup> T<sub>H</sub>1 (T<sub>H</sub>1\*) cells  
15 (Hambleton et al., 2011; Kong et al., 2018), a T<sub>H</sub>1 cell subset enriched in *Mycobacterium*-specific  
16 effector cells, whereas CCR6<sup>-</sup> T<sub>H</sub>1 cells do not respond to mycobacteria (Acosta-Rodriguez et al.,  
17 2007). ROR $\gamma$ /ROR $\gamma$ T deficiency impairs the development of iNKT and MAIT cells, and also  
18 decreases the production of IFN- $\gamma$  by  $\gamma\delta$  T and  $\alpha\beta$  T<sub>H</sub>1\* cells (Okada et al., 2015). Interestingly,  
19 although the lack of both  $\alpha\beta$  T and  $\gamma\delta$  T cells in SCID patients underlies BCG disease (Casanova  
20 et al., 1995), most, if not all other deficits of antigen-specific  $\alpha\beta$  T-cell responses, whether affecting  
21 only CD4<sup>+</sup> or CD8<sup>+</sup> T cells, such as HLA-II or HLA-I deficiency, typically do not (**Table S2**).  
22 Moreover, selective deficiencies of NK or iNKT cells do not confer a predisposition to  
23 mycobacterial disease (Casey et al., 2012; Cottineau et al., 2017; Gineau et al., 2012; Hughes et

1 al., 2012; Latour, 2007; Locci et al., 2009; Morgan et al., 2011; Tangye et al., 2017). The nature  
2 of the IFN- $\gamma$ -producing innate, innate-like adaptive, and purely adaptive lymphocyte subsets  
3 indispensable for antimycobacterial immunity, either alone or in combination, therefore remains  
4 largely unknown. No genetic cause has yet been identified for half the MSMD patients. We  
5 therefore sought to discover a new genetic etiology of MSMD that would expand the molecular  
6 circuit controlling human IFN- $\gamma$  immunity while better delineating the cellular network involved.  
7

## 1           **Results**

### 2           **Identification of an MSMD patient homozygous for an indel variant of *TBX21***

3           We studied a three-year-old boy (“P”) born to first-cousin Moroccan parents (**Fig. 1A**). He  
4           suffered from disseminated BCG disease (BCG-osis) following vaccination at the age of three  
5           months. He also had persistent reactive airway disease (RAD), but was otherwise healthy  
6           (Supplementary Material - Case Report). He did not suffer from any other severe infectious  
7           diseases despite documented (VirScan) infection with various viruses, including Epstein-Barr  
8           virus (EBV), human cytomegalovirus (CMV), roseola virus, adenoviruses A, B, C and D, influenza  
9           virus A, rhinovirus A, and bacteria, such as *Streptococcus pneumoniae* and *Staphylococcus aureus*  
10          (**Fig. S1B**). We hypothesized that P had an autosomal recessive (AR) defect. We performed whole-  
11          exome sequencing (WES) on P, his unaffected brother, and both parents. Genome-wide linkage  
12          (GWL) analysis revealed 32 linked regions (LOD score >1.3 and size >500 kb) under a model of  
13          complete penetrance (**Fig. S1C**). In these linked regions, there were 15 rare homozygous non-  
14          synonymous or essential splicing variants in 15 different genes (minor allele frequency, MAF <  
15          0.003 in gnomAD v2.1 and 1000 Genomes Project, including for each major ancestry) with a  
16          combined annotation-dependent depletion (CADD) score above their mutation significance  
17          cutoffs (MSC) (Consortium, 2015; Itan et al., 2016; Kircher et al., 2014; Zhang et al., 2018) (**Fig.**  
18          **S1D, Table S3**). After the exclusion of genes with other predicted loss-of-function (LOF) variants  
19          with a frequency greater than 0.5% in gnomAD, 12 candidate genes remained (**Table S3**). The  
20          c.466\_471delGAGATGinsAGTTTA insertion and/or deletion (indel) variant of *TBX21* (T-box  
21          protein 21, or T-box, expressed in T cells, T-bet) was the candidate variant predicted to be the  
22          most damaging (Kircher et al., 2014). Moreover, based on connectivity to *IFNG*, the central gene  
23          of the entire network of all known MSMD-causing genes (Itan et al., 2013, 2014), *TBX21* was the



1 most plausible candidate gene (**Table S4**). T-bet is a transcription factor that governs the  
2 development or function of several IFN- $\gamma$ -producing lymphocytes in mice, including T<sub>H1</sub> cells  
3 (Lazarevic et al., 2013; Szabo et al., 2000, 2002). These findings suggested that homozygosity for  
4 the rare indel variant c.466\_471delGAGATGinsAGTTTA of *TBX21* is MSMD-causing. We  
5 investigated this variant according to the guidelines for genetic studies of single patients (Casanova  
6 et al., 2014). Sanger sequencing confirmed that P carried the indel variant in exon 1 of *TBX21*  
7 whereas his unaffected brother was homozygous wild-type (WT/WT) and both parents were  
8 heterozygous (WT/M) (**Fig. S1E**). A closely juxtaposed 12-nucleotide (nt) region identical to this  
9 variant sequence was detected 8-nt upstream from the variant, and may have served as a template  
10 for the generation of this variant (**Fig. S2A**). The variant did not alter the exon 1-exon 2 junction  
11 of the *TBX21* mRNA in EBV-transformed B (EBV-B) cells or peripheral blood mononuclear cells  
12 (PBMCs) (**Fig. S2B - D**). The variant present in P thus resulted in the replacement of E156 and  
13 M157, two amino acids that are highly conserved across different species and among other  
14 paralogs of T-box transcription factors, with S156 and L157 (**Fig. 1B** and **Fig. S3A**).

15

### 16 **Overexpressed mutant T-bet is LOF**

17 We investigated the expression of the mutant allele (Mut), by overexpressing empty vector  
18 (EV), and vectors containing the WT or Mut allele, or negative controls with the T-box domain  
19 deleted (T-del) or K314R, the human ortholog of a known LOF mouse mutant, in human  
20 embryonic kidney (HEK) 293T cells (Jang et al., 2013). The production and nuclear translocation  
21 of Mut T-bet were impaired (**Fig. 1C** and **Fig. S3B**). When its DNA-binding activity to consensus  
22 T-box regulatory elements (TBRE) was assessed, nuclear proteins from WT-transfected cells  
23 bound the WT-TBRE but not the Mut-TBRE, and this specific complex was super-shifted by an

1 anti-T-bet antibody (Ab) and inhibited by a competitor probe (CP). However, Mut T-bet did not  
2 bind WT-TBRE DNA (**Fig. 1D**). We also tested the ability of WT and Mut T-bet to induce a  
3 luciferase transgene under the control of the TBRE or human *IFNG* proximal promoter (Chen and  
4 Prywes, 1999; Janesick et al., 2012; Soutto et al., 2002; Tong et al., 2005a). WT T-bet induced  
5 high levels of luciferase activity with WT-TBRE but not with Mut-TBRE. Mut T-bet and the  
6 negative controls (T-del and K314R) did not induce luciferase activity (**Fig. 1E**). Mut T-bet was  
7 also LOF for transactivation of the *IFNG* promoter, whereas the negative control K314R was  
8 markedly hypomorphic (**Fig. 1F**). We investigated the amino-acid substitution responsible for the  
9 abolition of transcriptional activity. We tested the effects of the WT and Mut forms of T-bet and  
10 of T-bet forms with single-residue substitutions (E156S and M157L), or alanine substitutions  
11 (E156A and M157A) on T-bet protein production and transcriptional activity. The loss of E156  
12 (E156S and E156A) abolished transcriptional activity, but the production of the T-bet protein was  
13 unaffected. By contrast, a loss of methionine residues (M157L and M157A) preserved  
14 transcriptional activity but decreased the levels of T-bet protein expression (**Fig. S3C and D**). T-  
15 bet is necessary for the optimal production of IFN- $\gamma$  in NK, ILCs,  $\gamma\delta$ , and CD4<sup>+</sup> T cells in mice  
16 and is sufficient for IFN- $\gamma$  production in NK and CD4<sup>+</sup> T cells in humans (Chen et al., 2007;  
17 Lazarevic et al., 2013; Powell et al., 2012; Szabo et al., 2002; Yu et al., 2006). We investigated  
18 the impact of the T-bet mutation on the induction of *IFNG* expression, by generating CRISPR/Cas9  
19 gene-edited human NK-92 cell lines lacking *TBX21* (**Fig. S4A - D**). Upon stimulation with IL-12  
20 + IL-18, these *TBX21* knockout (KO) NK-92 cells displayed a strong impairment of IFN- $\gamma$   
21 production (**Fig. 1G and Fig. S4E**). Following re-introduction of the WT or Mut *TBX21*-containing  
22 plasmid into *TBX21* KO NK-92 cells, the WT *TBX21* rescued IFN- $\gamma$  production by *TBX21* KO  
23 cells, whereas the Mut *TBX21* did not (**Fig. 1H, Fig. S4F and G**). Finally, the overexpression of

1 WT, but not of Mut T-bet increased IFN- $\gamma$  levels to values above those for endogenous production  
2 in expanding naïve CD4<sup>+</sup> T cells from healthy donors (**Fig. 1I** and **J**, **Fig. S4H**). Thus, Mut T-bet  
3 overexpression abolished DNA binding, and the mutant protein had no transactivation activity,  
4 failed to induce IFN- $\gamma$  production in an NK cell line or primary CD4<sup>+</sup> T cells, and can therefore  
5 reasonably be considered a LOF allele.

6

### 7 ***TBX21* variants in the general population are functional**

8 The *TBX21* indel variant in P was not found in the gnomAD v2.1, Bravo, or Middle Eastern  
9 cohort databases, or our in-house database of more than 6,000 exomes, including > 1,000  
10 individuals of North African origin (Karczewski et al., 2019; Scott et al., 2016; Taliun et al., 2019).  
11 The CADD score of 34 obtained for this allele is well above the MSC of 3.313 (**Fig. 1K**) (Itan et  
12 al., 2016; Kircher et al., 2014; Zhang et al., 2018). The *TBX21* gene has a low tolerance of  
13 deleterious variations, with a low gene damage index (GDI) score of 3.493 (Itan et al., 2015) and  
14 a low residual variation intolerance score (RVIS: -0.74) (Petrovski et al., 2015). Moreover, only  
15 three predicted LOF variants (variant: 17:45821662 T / TATCTTTACTTATGCTGTGG,  
16 variant: 17:45822565 G / GC, variant: 17:45822322 C/T) were found in the heterozygous state in  
17 gnomAD (Karczewski et al., 2019). As their MAFs were  $<5 \times 10^{-6}$ , homozygosity rates for any of  
18 these three variants are well below the prevalence of MSMD (about 1/50,000). In the general  
19 population covered by the gnomAD database, seven variants have been identified in the  
20 homozygous state: A109G has a low CADD score, below the MSC, whereas H33Q, I339V, Y395C,  
21 M331I, R218H, and A29P have CADD scores above the MSC (**Fig. 1K** and **Fig. S5A**). The mouse  
22 ortholog of H33Q (H32Q) has been shown to be functionally neutral (Tantisira et al., 2004). None  
23 of these seven alleles affected transactivation of the WT-TBRE promoter (**Fig. 1L** and **Fig. S5B**).

1 Thus, all the *TBX21* variants present in the homozygous state in gnomAD are functionally neutral.  
2 In our in-house cohort of >6,000 exomes from patients with various infectious phenotypes, P is  
3 the only patient carrying a rare bi-allelic variant at the *TBX21* locus. We investigated whether any  
4 of the other 28 non-synonymous variants of *TBX21* in our in-house database could underlie  
5 infections in the heterozygous state, by testing each of them experimentally. None had any  
6 functional impact on transcriptional activity (**Fig. S5C - E**). Therefore, the data for P and his family,  
7 our in-house cohort, and the general population suggest that inherited T-bet deficiency, whether  
8 complete or partial, is exceedingly rare in the general population ( $< 5.8 \times 10^{-8}$ ). These findings also  
9 suggest that homozygosity for the Mut LOF variant of *TBX21* is responsible for MSMD in P.

10

### 11 **Homozygosity for the *TBX21* mutation underlies complete T-bet deficiency**

12 We investigated the production and function of endogenous Mut T-bet in T-saimiri virus-  
13 transformed T cells (HVS-T) and primary CD4<sup>+</sup> T cells from P. Levels of *TBX21* mRNA were  
14 normal, but endogenous T-bet protein levels were low in P's cells (**Fig. 2A and B, Fig. S6A and**  
15 **B**). Together with the observation of low levels of Mut T-bet protein on overexpression (**Fig. S3**),  
16 these findings suggest that the *TBX21* mutation decreases T-bet protein levels by a post-  
17 transcriptional mechanism. T-bet transactivates *IFNG* and *TNF* by directly binding to their  
18 regulatory promoter or enhancer (Garrett et al., 2007; Kanhere et al., 2012; Soutto et al., 2002;  
19 Szabo et al., 2000; Tong et al., 2005a). Levels of spontaneous IFN- $\gamma$  and TNF- $\alpha$  production by P's  
20 HVS-T cells were much lower than those for HVS-T cells from healthy donors and heterozygous  
21 relatives (**Fig. 2 C - F**). This defect of cytokine production by *TBX21* mutant HVS-T cells was  
22 rescued by WT T-bet complementation (**Fig. 2G and Fig. S6C**). The functional impact of the T-  
23 bet mutation was also investigated in primary CD4<sup>+</sup> T cells. Upon stimulation with phorbol 12-

1 myristate 13-acetate (PMA) and ionomycin (P/I), IFN- $\gamma$  production was almost entirely abolished  
2 in P's expanded T<sub>H0</sub> cell subset and TNF- $\alpha$  production was impaired; the production of both these  
3 molecules was rescued by WT T-bet (**Fig. 2H and I, Fig. S6D - F**). In T<sub>H1</sub> conditions, exogenous  
4 IL-12 bypassed T-bet and induced moderate IFN- $\gamma$  production by P's cells, but the levels of this  
5 cytokine were still ~60-70% lower than those in healthy controls (**Fig. 2H and I**). We investigated  
6 other T-bet-dependent transcriptional targets, by performing RNA-seq to compare T<sub>H0</sub> cells from  
7 controls, P, and P's cells complemented with WT T-bet after incubation with anti-CD3/28 Ab  
8 beads. We found that the transcription of 455 was downregulated and that of 536 genes was  
9 upregulated in P's cells (**Fig. S7A, Table S5**). The complementation of P's cells with WT T-bet  
10 reversed the differential expression of 106 of the genes downregulated and 174 of the genes  
11 upregulated in P's cells relative to controls (**Fig. S7B and C**). These targets were enriched in  
12 cytokine signaling pathway genes (**Fig. 2J**). We therefore decided to focus on genes involved in  
13 immunological signaling. Only 37 such genes were upregulated, and 33 downregulated in P's cells,  
14 but these differences in expression relative to controls were reversed by WT T-bet (**Fig. 2K and**  
15 **Fig. S7D - F**). Known T-bet-dependent targets, such as *IFNG*, *CCL3* and *CXCR3*, were  
16 downregulated in this patient with T-bet deficiency, whereas *IFNGR2* expression was upregulated  
17 (**Fig. 2L**) (Iwata et al., 2017; Jenner et al., 2009). A set of new T-bet target genes was also identified,  
18 including *CCL1*, *CCL13*, *CCL4*, *CSF2*, *CXCR5*, *GZMM*, *IDO1*, *IL10*, *ITGA5*, and *ITGB5* (**Fig.**  
19 **2L**). Collectively, our data indicate that the patient had AR complete T-bet deficiency, which  
20 affects the expression of a set of T-bet-dependent target genes.

21

22 **T-bet induces permissive chromatin accessibility and CpG methylation in *IFNG***

1           We analyzed the molecular mechanisms by which T-bet controls transcription.  
2   Epigenetically, T-bet, is known to induce a permissive environment for transcription at the *IFNG*  
3   promoter through histone modifications and the suppression of CpG methylation (Lewis et al.,  
4   2007; Miller and Weinmann, 2010; Tong et al., 2005b). However, it remains unknown whether T-  
5   bet directly regulates chromatin accessibility in mice or humans. The regulation of CpG  
6   methylation at the genome-wide scale by T-bet has never been studied. We performed omni-  
7   ATAC-seq analysis and EPIC DNA CpG methylation array analysis with T<sub>H</sub>0 cells derived from  
8   P and controls (Corces et al., 2017). In P's cells, a gain of chromatin accessibility was observed at  
9   1,787 loci and a loss of chromatin accessibility was observed at 3,689 loci (**Fig. 3A and B, Fig.**  
10 **S8A - C**). We found that 666 and 1,649 of these loci, respectively, were subject to strict regulation  
11 by T-bet, as their gains and losses of chromatin accessibility were reversed by WT T-bet (**Fig. 3B,**  
12 **Table S6**). The chromatin regions opened out by T-bet were heavily occupied by bound T-bet,  
13 whereas those closed up by T-bet did not typically require T-bet binding (**Fig. 3C**) (Kanhere et al.,  
14 2012). An enrichment in T-box and ZBTB7B binding elements was observed in loci displaying an  
15 increased chromatin accessibility by T-bet, whereas an enrichment in Forkhead box elements was  
16 observed at loci at which chromatin accessibility was decreased by T-bet (**Fig. 3D - F**). The  
17 chromatin accessibility of 192 immunological genes, including *IL23R* and *IRF8*, two known  
18 MSMD-causing genes (Hambleton et al., 2011; Martínez-Barricarte et al., 2018; Salem et al.,  
19 2014), was increased by T-bet, whereas that of 75 immunological genes was decreased by T-bet  
20 (**Fig. 3G, Fig. S8 and 9**). Three known T-bet-dependent targets, *IFNG*, *TNF* and *CXCR3*, were  
21 among the top hits for the differentially regulated loci. The transcription start sites (TSS) of *IFNG*  
22 and *TNF*, the proximal promoter of *IFNG*, and the enhancers of *CXCR3* were inaccessible in T-  
23 bet deficient cells, and this inaccessibility was rescued by WT T-bet (**Fig. 3H - J**). The EPIC DNA

1 CpG methylation array analysis identified 644,236 CpG sites that were differentially regulated  
2 (**Table S7**). Three CpG loci within *IFNG* were hypermethylated in conditions of T-bet deficiency,  
3 whereas their methylation was reduced to levels similar to those in controls on complementation  
4 with WT T-bet (**Fig. 3K** and **L**). *NR5A2*, *TIMD4*, *ATXN2*, *ZAK*, *SLAMF8*, *TBKBP1*, *CD247*,  
5 *HDAC4* and several other genes were also regulated in a similar manner (**Fig. 3K**). Interestingly,  
6 the methylation of six CpG loci within *ENTPDI* not previously linked to T-bet also increased in a  
7 T-bet-dependent manner (**Fig. 3K** and **L**). By contrast, *IL10* was a top target for which CpG  
8 methylation was drastically reduced in T-bet deficiency but rescued by WT T-bet (**Fig. 3K** and  
9 **M**). Taken together, these results demonstrate that T-bet orchestrates the expression of target genes  
10 by modulating both their chromatin accessibility and CpG methylation. Genome-wide omni-  
11 ATAC-seq and CpG methylation array analyses identified new epigenetic targets of T-bet (**Table**  
12 **S6** and **S7**). They also showed that chromatin accessibility at *IFNG* was increased by T-bet at both  
13 the TSS and promoter sites, whereas the CpG methylation of *IFNG* was dampened by T-bet at  
14 three different positions.

15

### 16 **T-bet deficiency impairs NK cell maturation**

17 We then investigated the role of T-bet in the development of leukocyte lineages. Complete  
18 blood counts for fresh samples from P fresh samples showed that the numbers of lymphocytes,  
19 neutrophils, and monocytes were normal. We studied the PBMC subsets of P after the patient had  
20 been cured of mycobacterial disease, by mass cytometry (cytometry by time-of-flight, CyTOF)  
21 studies of 38 markers and comparisons with P's parents, healthy donors, and patients with IL-  
22 12R $\beta$ 1 deficiency, the most common etiology of MSMD, as controls. The frequencies of  
23 plasmacytoid DCs (pDCs) and conventional DC 1 and 2 (cDC1 and cDC2) were not affected by

1 human T-bet deficiency (**Fig. S10**). All major myeloid lineages were normal in P. We therefore  
2 focused on the development of lymphoid lineages. Total NK cells (defined as Lin<sup>-</sup>CD7<sup>+</sup>CD16<sup>+</sup> or  
3 CD94<sup>+</sup>) were present in normal numbers in P. However, CD16<sup>+</sup> and CD56<sup>bright</sup> NK cells levels  
4 were ~25- and ~15-fold lower, respectively, in P than in the controls (**Fig. 4A – C**). Moreover, P  
5 had an abnormally high frequency of CD56<sup>-</sup>CD127<sup>-</sup> NK cells (**Fig. S11**); this NK cell subset has  
6 low levels of cytotoxicity and is rare in healthy and normal individuals (Björkström et al., 2010).  
7 The frequencies of ILC precursor (ILCP) and ILC2 in P were similar to those in healthy donors  
8 and IL-12Rβ1-deficient patients (**Fig. S12**). In stringent analyses, ILC1 and ILC3 are too rare for  
9 quantification in human peripheral blood (Lim et al., 2017). Overall, human T-bet is required for  
10 the correct development or maturation of NK cells, but not monocytes, DCs, ILC2 or ILCP.

11

### 12 **Diminished iNKT, MAIT, and Vδ2<sup>+</sup> γδ T-cell lineages in T-bet deficiency**

13 The iNKT, MAIT, and γδ T cells are “innate-like” adaptive T-cell lineages with less T-cell  
14 receptor (TCR) diversity than conventional, “purely” adaptive αβ T cells (Chien et al., 2014;  
15 Crosby and Kronenberg, 2018; Godfrey et al., 2019). iNKT cells constitute a group of T cells with  
16 invariant TCRs combining properties from both T cells and NK cells (Crosby and Kronenberg,  
17 2018). The iNKT cells of P were barely detectable (present at levels ~200-fold lower than in  
18 controls) (**Fig. 4D, Fig. S13A and B**). MAIT cells express invariant Vα7.2-Jα33 TCRα restricted  
19 by a monomorphic class I-related MHC molecule, along with ligands derived from vitamin B  
20 synthesis (Kjer-Nielsen et al., 2012; Xiao and Cai, 2017). P also had a lower frequency of MAIT  
21 cells than controls (~15-fold) (**Fig. 4E and Fig. S13C**). Total γδ T-cell frequency in P was normal  
22 (**Fig. S13D**). However, the frequency of the Vδ2<sup>+</sup> subset, a group of γδ T cells that recognize  
23 phosphoantigen (pAgs) (Gu et al., 2018; Harly et al., 2012; Vavassori et al., 2013), was low (~8-



1 fold lower than control levels) in P, whereas the V $\delta$ 1<sup>+</sup> subset of  $\gamma\delta$  T cells was normal (**Fig. 4F**,  
2 **Fig. S13E and F**). Mild abnormalities of B-lymphocyte development and antibody production  
3 unrelated to the patient's mycobacterial disease were observed and will be reported in a separate  
4 study (Yang R, in preparation). CD4<sup>+</sup> and CD8<sup>+</sup>  $\alpha\beta$  T cells were the two most prevalent blood  
5 lineages of adaptive lymphocytes expressing a highly diverse  $\alpha\beta$  TCR repertoire. Antigen-driven  
6 CD8<sup>+</sup> T-cell effector responses and the optimal induction of memory CD8<sup>+</sup> T cells in mice are  
7 controlled by T-bet (Bettelli et al., 2004; Juedes et al., 2004; Sullivan et al., 2003). In the T-bet-  
8 deficient patient, total CD8<sup>+</sup> T cells and the composition of naïve, central memory, effector  
9 memory and T<sub>EMRA</sub> cells were normal (**Fig. S13G**). We further investigated CD8<sup>+</sup> T cells in an  
10 unbiased manner, by automatic viSNE clustering with a panel of surface markers, including  
11 chemokine receptors (Amir el et al., 2013). We found no apparent difference between the memory  
12 CD8<sup>+</sup> T cells of P and controls. However, a small subset of naïve CD8<sup>+</sup> T cells  
13 (CD45RA<sup>+</sup>CD38<sup>int</sup>CXCR3<sup>int</sup>CCR6<sup>-</sup>CCR5<sup>-</sup>CD27<sup>high</sup>CD127<sup>high</sup>) was absent from P (**Fig. S13H**).  
14 Thus, the development of iNKT, MAIT cells, V $\delta$ 2<sup>+</sup>  $\gamma\delta$  T cells, and a small subset of naïve CD8<sup>+</sup> T  
15 cells is impaired in T-bet deficiency.

16

### 17 **Selective depletion of CCR6<sup>-</sup> T<sub>H</sub>1 in CD4<sup>+</sup> T cells in T-bet deficiency**

18 Both P and his heterozygous parents had normal distributions of naïve and memory CD4<sup>+</sup>  
19 T cells (**Fig. S14A**). We further analyzed individual CD4<sup>+</sup> T-cell subsets, by viSNE clustering on  
20 antigen-experienced cells in particular (Amir el et al., 2013). Several memory CD4<sup>+</sup> T-cell  
21 populations typically present in healthy donors were missing in P. Indeed, most of the CCR5<sup>+</sup> cells  
22 (subset 1) and CXCR3<sup>+</sup> cells (subsets 3 and 4), corresponding to T<sub>H</sub>1 cells in humans (Groom and  
23 Luster, 2011; Loetscher et al., 1998; Sallusto et al., 1998), were missing in P (**Fig. 4G and Fig.**

1 **S14B**). A subset of CXCR3<sup>high</sup> memory CD4<sup>+</sup> T cells (CXCR3 subset 2 -  
2 CXCR3<sup>high</sup>CD27<sup>low</sup>CD127<sup>low</sup>CD38<sup>int</sup>) was, however, preserved (**Fig. 4G**). A cluster of  
3 CD127<sup>+</sup>CD27<sup>+</sup>CD25<sup>+</sup>CCR7<sup>+</sup>CD161<sup>+</sup> cells (subset 5) was also missing (**Fig. 4G**). The frequency  
4 of classic CXCR3<sup>+</sup>CCR6<sup>-</sup> T<sub>H1</sub> cells was lower than that in controls (about nine-fold lower),  
5 whereas the frequency of CXCR3<sup>+</sup>CCR6<sup>+</sup> non-classic T<sub>H1</sub>\* cells, which are known to be mostly  
6 mycobacterium-specific, was unaffected (**Fig. 4H and I**). The frequencies of human T<sub>H2</sub>, T<sub>H17</sub>,  
7 and follicular helper (T<sub>FH</sub>) cells in peripheral blood were normal (**Fig. S14C - E**). However, the  
8 CXCR3<sup>+</sup> T<sub>FH</sub> cells, a group of T<sub>H1</sub>-biased T<sub>FH</sub> cells that produce IFN- $\gamma$  together with IL-21 in  
9 germinal centers (Velu et al., 2016; Zhang et al., 2019a), was diminished in P (**Fig. S14E**).  
10 CXCR3<sup>+</sup> regulatory T cells (Tregs), a group of T<sub>H1</sub>-skewed Tregs (Koch et al., 2009; Levine et  
11 al., 2017; Tan et al., 2016), and CCR5<sup>+</sup> Tregs were also present at abnormally low levels, but the  
12 level of total Tregs was normal (**Fig. S14F and G**). Thus, human T-bet deficiency selectively  
13 impairs the development of the classic CCR6<sup>-</sup> T<sub>H1</sub>, CXCR3<sup>+</sup> T<sub>FH</sub>, and CXCR3<sup>+</sup> or CCR5<sup>+</sup> Treg  
14 CD4<sup>+</sup> T-cell subsets, but has no effect on the T<sub>FH</sub>, T<sub>H2</sub>, T<sub>H17</sub>, CCR6<sup>+</sup> T<sub>H1</sub>\*, and total Treg subsets,  
15 as shown by CyTOF and flow cytometry.

16

### 17 **Single-cell transcriptomic profile *in vivo* is altered by T-bet deficiency**

18 We investigated the development and phenotype of leukocyte subsets in the patient further,  
19 by performing single-cell RNA-seq (scRNA-seq) with PBMCs from P and his father. The  
20 clustering of the various immune subsets yielded eight distinct major subsets: NK cells, pDCs,  
21 monocytes, B cells, CD8<sup>+</sup> cytotoxic T lymphocytes (CTLs), CD8<sup>+</sup> naïve, CD4<sup>+</sup> naïve and CD4<sup>+</sup>  
22 effector/memory T (T<sub>EM</sub>) cells (Becht et al., 2019). Consistent with the CyTOF results, normal  
23 frequencies of pDC, CTL, CD4<sup>+</sup> naïve, T<sub>EM</sub>, and a low frequency of NK cells were obtained with

1 scRNA-seq (**Fig. S15A**). We investigated the transcriptomic changes at single-cell level associated  
2 with T-bet deficiency, by filtering to select all genes with expression detected in > 5% of cells in  
3 at least one cluster, with at least a four-fold change in expression. We identified 34 genes as  
4 differentially regulated in T-bet-deficient cells relative to a heterozygous control. As for our RNA-  
5 seq data, some targets, including *CXCR3* in T<sub>EM</sub>, CD8<sup>+</sup> CTL, and NK cells, *IRF8* in NK cells, and  
6 *CCL4* and *CCL3* in all cell types, before which expression was known to be dependent on T-bet,  
7 were downregulated in T-bet-deficient cells (**Fig. 4J** and **Fig. S15B**). The expression of *XCL1*,  
8 *STAT4*, *SOX4*, *LMNA* and *ANXA1* was also impaired in at least one subset of T-bet-deficient cells  
9 (**Fig. 4J** and **Fig. S15B**). In humans and mice, *XCL1*, *STAT4*, *SOX4*, *LMNA* and *ANXA1* are  
10 known to be involved in T<sub>H</sub>1 immunity (Dorner et al., 2002, 2003, 2004; Gavins and Hickey, 2012;  
11 Kroczek and Henn, 2012; Nishikomori et al., 2002; Thieu et al., 2008; Toribio-Fernández et al.,  
12 2018; Yoshitomi et al., 2018). *NKG7* is involved in the initiation of human T<sub>H</sub>1 commitment and  
13 its genetic locus is tightly occupied by T-bet (Jenner et al., 2009; Kanhere et al., 2012; Lund et al.,  
14 2005). The expression of *NKG7* in CD4<sup>+</sup>, CD8<sup>+</sup> and B cells was dependent on functional T-bet,  
15 whereas *PRMI* was downregulated in CD4<sup>+</sup> T and CD8<sup>+</sup> CTL cells from P (**Fig. 4J**). The *IFNG*  
16 gene was weakly expressed across lymphocyte populations, as shown by scRNAseq, and its  
17 expression did not seem to be dependent on T-bet in basal conditions (data not shown). In addition,  
18 the expression of several genes not previously linked to T-bet was also altered in at least one cell  
19 subset in P (**Fig. 4J**). Thus, in addition to *IRF8*, *CXCR3*, *NKG7*, *CCL3* and *CCL4*, the expression  
20 of which was weak in at least one immune subset from this patient with human T-bet deficiency,  
21 consistent with the findings of RNA-seq and omni-ATAC-seq, T-bet is also important for the  
22 expression of a set of previously unknown target genes in immune subsets (**Fig. 4J**).

23

## 1           **Impaired IFN- $\gamma$ production by NK, MAIT, V $\delta$ 2<sup>+</sup> $\gamma$ $\delta$ T, and CD8<sup>+</sup> T lymphocytes**

2           Human IFN- $\gamma$  is essential for antimycobacterial immunity, as all 30 known genetic  
3 etiologies of MSMD affect IFN- $\gamma$ -dependent immunity. The *in vivo* development of NK, iNKT,  
4 MAIT, V $\delta$ 2<sup>+</sup>  $\gamma$  $\delta$  T, and classic T<sub>H</sub>1 cells was found to be impaired in P, but it remained possible  
5 that the IFN- $\gamma$  production capacity of the remaining lymphocytes could compensate, thereby  
6 contributing to antimycobacterial immunity. We assessed the potential of P's NK cells to respond  
7 to *ex vivo* stimulation with IL-12, IL-15 and IL-18. When stimulated, total NK cells from P  
8 displayed impaired degranulation, with low levels of CD107a expression, and almost no IFN- $\gamma$   
9 production (**Fig. 5A and B, Fig. S16A-C**). However, intracellular perforin and granzyme B levels  
10 in NK cells were unaffected by T-bet deficiency (**Fig. S16D and E**). The frequency of IFN- $\gamma$ -  
11 producing total lymphocytes was also low in P (~18-fold lower than in controls), whereas the  
12 frequency of TNF- $\alpha$ -producing cells was only slightly lower than in the controls (~2.5-fold lower),  
13 in response to P/I stimulation *ex vivo* (**Fig. 5C – E**). By contrast, no detectable IFN- $\gamma$ -producing  
14 iNKT cells were detected in P or controls due to their very low frequency in peripheral blood.  
15 MAIT cells were present at a lower (~14-fold lower than controls) frequency *in vivo* in P, and  
16 these cells presented impaired production of IFN- $\gamma$  (~9-fold lower than control levels) and TNF- $\alpha$   
17 (~3 fold-fold lower) *ex vivo* (**Fig. 5F and G, Fig. S16F**). Similarly, IFN- $\gamma$ -producing V $\delta$ 2<sup>+</sup>  $\gamma$  $\delta$  T  
18 cells were barely detectable (~17-fold less frequent than in controls) whereas the frequency of  
19 TNF- $\alpha$ -producing V $\delta$ 2<sup>+</sup>  $\gamma$  $\delta$  T cells was only slightly low (~3-fold lower than control levels) *ex vivo*  
20 (**Fig. 5H and I, Fig. S16G**). By contrast, we observed no difference in IFN- $\gamma$  and TNF- $\alpha$   
21 production by the cells of the V $\delta$ 2<sup>-</sup>  $\gamma$  $\delta$  T subset between P and controls (**Fig. 5J and K, Fig. S16H**).  
22 CD8<sup>+</sup> T cells secrete substantial amounts of IFN- $\gamma$  upon microbial challenge (Wilson and  
23 Schoenborn, 2007). The frequency of CD8<sup>+</sup> T cells producing IFN- $\gamma$  in response to P/I was low in

1 P (about 28-fold lower than in controls), whereas the frequency of TNF- $\alpha$ -producing CD8<sup>+</sup> T cells  
2 was unaffected (**Fig. 5L and M, Fig. S16I**). Among the remaining circulating lymphocytes in the  
3 patient, NK, MAIT, V $\delta$ 2<sup>+</sup>  $\gamma$  $\delta$  T cells, and CD8<sup>+</sup> T were equally defective for the production of  
4 IFN- $\gamma$  *ex vivo* in response to IL-12, IL-15, IL-18 or P/I stimulation whereas V $\delta$ 2<sup>-</sup>  $\gamma$  $\delta$  T cells were  
5 not.

6

### 7 **Selective impairment of IFN- $\gamma$ production by T<sub>H</sub> cells in T-bet deficiency**

8 T-bet was first discovered and has been most extensively studied in CD4<sup>+</sup> T cells in the  
9 context of mouse T<sub>H</sub>1 cells (Szabo et al., 2000, 2002). This discover, together with that of GATA3  
10 (Zheng and Flavell, 1997), revealed the molecular determinism of T<sub>H</sub>1/T<sub>H</sub>2 CD4<sup>+</sup> T cell  
11 differentiation and paved the way for an understanding of T<sub>H</sub>17, iTreg, T<sub>H</sub>22, T<sub>FH</sub>, and T<sub>H</sub>9 cell  
12 lineage determination (Zhu et al., 2010). We therefore investigated the impact of T-bet deficiency  
13 in primary CD4<sup>+</sup> T cells. IFN- $\gamma$  production by memory CD4<sup>+</sup> T cells was impaired by T-bet  
14 deficiency (**Fig. 5N and O**). Another T<sub>H</sub>1 cytokine, TNF- $\alpha$ , was also produced in smaller amounts  
15 by memory CD4<sup>+</sup> T cells from P than by those of most of the healthy controls (**Fig. 5P and Q**).  
16 The memory CD4<sup>+</sup> T cells of P produced larger amounts of the T<sub>H</sub>17 effector cytokines IL-22 and  
17 IL-17A than those from healthy donors (**Fig. 5R and S, Fig. S17A**). Unlike previous studies  
18 (Gokmen et al., 2013; Zhang et al., 2019b), we found that T-bet deficiency had no effect on IL-9  
19 production *ex vivo* (**Fig. S17B and C**). Surprisingly, *ex vivo* T<sub>H</sub>2 cytokines from memory CD4<sup>+</sup> T  
20 cells were not affected by human T-bet deficiency (**Fig. S17E - G**). P's memory CD4<sup>+</sup> cells  
21 produced less IL-21 *ex vivo* than the memory CD4<sup>+</sup> cells of most of the controls (**Fig. S17H**). We  
22 then investigated the role of T-bet in human T<sub>H</sub> cell differentiation *in vitro*. Naïve CD4<sup>+</sup> T cells  
23 from P or healthy donors were allowed to differentiated in T<sub>H</sub>0, T<sub>H</sub>1, T<sub>H</sub>2, T<sub>H</sub>9, or T<sub>H</sub>17 conditions.

1 The induction of IFN- $\gamma$  production in naïve CD4<sup>+</sup> T cells was abolished by T-bet deficiency under  
2 T<sub>H</sub>1 conditions (**Fig. 5T and U**). Similarly, T-bet-deficient naïve CD4<sup>+</sup> T cells produced less TNF-  
3  $\alpha$  than the corresponding cells from most controls (**Fig. 5V and W**). Furthermore, the induction of  
4 IL-9 in various conditions *in vitro* was weaker in naïve CD4<sup>+</sup> T cells from P than in the  
5 corresponding cells from most controls (**Fig. S17I and J**). *In vitro*-induced T<sub>H</sub>2 cells from P  
6 produced more IL-10, but not IL-13, than control cells (**Fig. S17K and L**). Even memory CD4<sup>+</sup> T  
7 cells from P displayed impaired IFN- $\gamma$  and TNF- $\alpha$  production under T<sub>H</sub>1 polarizing conditions  
8 (**Fig. 5X**). Thus, AR T-bet deficiency leads not only to defective IFN- $\gamma$  and TNF- $\alpha$  production *ex*  
9 *vivo* and *in vitro*, but also to a moderate upregulation of the production of IL-17A and IL-22, two  
10 cytokines characteristic of T<sub>H</sub>17 cells (Lazarevic et al., 2011).

11

### 12 **Poor cellular response to BCG infection *in vitro* in T-bet deficiency**

13 We investigated the molecular and cellular basis of BCG disease in P, by identifying the  
14 leukocyte subsets producing the largest amounts of IFN- $\gamma$  in a T-bet-dependent manner during  
15 acute BCG infection *in vitro*. The infection of PBMCs with BCG induced IFN- $\gamma$  production, which  
16 was further increased by stimulation with exogenous IL-12 (**Fig. 6A**). PBMCs from P had low  
17 levels of IFN- $\gamma$  production but normal levels of IL-6 and TNF- $\alpha$  production, and high levels of IL-  
18 5 and IL-13 production in response to BCG infection (**Fig. 6A, Fig. S18**). Almost all the IFN- $\gamma$ -  
19 producing cells had high levels of T-bet expression (**Fig. S19**). Thus, T-bet<sup>+</sup> IFN- $\gamma$ <sup>+</sup> double-  
20 positive cells were the major antimycobacterial cells, with a function potentially dependent on T-  
21 bet. However, T-bet<sup>+</sup> IFN- $\gamma$ <sup>+</sup> cells were low during acute infection in P (**Fig. 6B**). Among the T-  
22 bet<sup>+</sup> IFN- $\gamma$ <sup>+</sup> cells of healthy donors, CD56<sup>+</sup> NK, V $\alpha$ 7.2<sup>+</sup> MAIT, V $\delta$ 2<sup>+</sup>  $\gamma\delta$  T, and CD4<sup>+</sup> T cells were  
23 the dominant responders in the absence of additional cytokine, while V $\delta$ 2<sup>-</sup>  $\gamma\delta$  T, iNKT and CD8<sup>+</sup>

1 T cells represented the minority (**Fig. 6C and D, Fig. S20A**). However, these subsets of T-bet<sup>+</sup>  
2 IFN- $\gamma$ <sup>+</sup> cells were almost entirely depleted from P's PBMCs following BCG infection (**Fig. 6D**  
3 **and Fig. S20B**). We then investigated each leukocyte subset separately. Fewer than 1% of V $\delta$ 2<sup>+</sup>  
4  $\gamma\delta$  T cells, B cells, or CD4<sup>+</sup> T cells became T-bet<sup>+</sup> IFN- $\gamma$ <sup>+</sup> during BCG infection (**Fig. 6E**).  
5 However, ~4-7% of NK cells, iNKT, MAIT cells, and up to ~15% of V $\delta$ 2<sup>+</sup>  $\gamma\delta$  T cells from healthy  
6 donors, but not those from P, became T-bet<sup>+</sup> IFN- $\gamma$ <sup>+</sup> in response to BCG infection, and the  
7 frequency of these cells was further increased by exogenous IL-12 (**Fig. 6E**). Thus, the IFN- $\gamma$   
8 production controlled by T-bet during acute BCG infection *in vitro* takes place mostly in NK,  
9 MAIT, V $\delta$ 2<sup>+</sup>  $\gamma\delta$  T and CD4<sup>+</sup> T cells, but not in CD8<sup>+</sup> T cells. These experimental findings *in vitro*  
10 do not exclude a contribution of other subsets *in vivo*. Thus, the NK, iNKT, MAIT, and V $\delta$ 2<sup>+</sup>  $\gamma\delta$  T  
11 cells from healthy donors responded robustly to acute BCG infection *in vitro*, but these subsets  
12 were absent or functionally deficient in the patient with human T-bet deficiency.

13

#### 14 **Defective prolonged anti-BCG immunity mediated by V $\delta$ 2<sup>+</sup> $\gamma\delta$ T cells**

15 The stimulation of PBMC *in vitro* with live BCG involves both antigens specifically  
16 recognized by mycobacterium-specific cognate  $\alpha\beta$  and  $\gamma\delta$  T cells and many other stimuli. BCG  
17 infection *in vitro* mimics acute infection *in vivo*, but may not be robust enough for investigations  
18 of the antigen-specific adaptive immune response, particularly as concerns prolonged adaptive  
19 immunity. We therefore studied V $\delta$ 2<sup>+</sup>  $\gamma\delta$  T cells and CD4<sup>+</sup>  $\alpha\beta$  T cells, two adaptive immune  
20 lymphocyte subsets that produced significant amounts of IFN- $\gamma$  during BCG infection *in vitro* and  
21 are known to function in an antigen-specific manner. In PBMCs from healthy donors, ~15% of the  
22 V $\delta$ 2<sup>+</sup>  $\gamma\delta$  T cells became T-bet<sup>+</sup> IFN- $\gamma$ <sup>+</sup> during BCG infection (**Fig. 6E**). V $\delta$ 2<sup>+</sup>  $\gamma\delta$  T cells, a major  
23 subset of  $\gamma\delta$  T cells recognizing phosphoantigen (pAg) derived from microbial sources (Gu et al.,

1 2018; Harly et al., 2012; Vavassori et al., 2013), are also known to play an essential role in the  
2 recall response to mycobacterial re-infection in humans and non-human primates (Chen, 2005;  
3 Shen et al., 2002). They proliferate vigorously in response to mycobacterial infection *in vivo* and  
4 can expand robustly in response to pAg-rich-lysates of mycobacterial species *in vitro* (Hoft et al.,  
5 1998; Modlin et al., 1989; Panchamoorthy et al., 1991; Parker et al., 1990; Tsukaguchi et al., 1995).  
6 We investigated whether V $\delta$ 2<sup>+</sup>  $\gamma\delta$  T cells were functionally affected in the patient with T-bet  
7 deficiency, as these cells represented a small, but important proportion (~0.2%) of P's peripheral  
8 lymphocytes. The populations of V $\delta$ 2<sup>+</sup> T cells from all controls and relatives of P expanded  
9 vigorously following prolonged stimulation with BCG lysates. By contrast, no such expansion was  
10 observed for T-bet-deficient V $\delta$ 2<sup>+</sup> T cells (**Fig. 6F and G, Fig. S21A and B**). After two weeks of  
11 expansion, the levels of IFN- $\gamma$  production by T-bet-deficient cells were lower than those for  
12 healthy control cells (**Fig. S21C**).

13

#### 14 **Redundant role of T-bet in IFN- $\gamma$ production by BCG-specific cognate T<sub>H1</sub><sup>\*</sup> cells**

15 It remains unclear whether the prolonged adaptive immunity to mycobacteria elicited by  
16 memory CD4<sup>+</sup> T cells is dependent on T-bet. We addressed this issue by screening antigen-reactive  
17 T cell libraries established from CD4<sup>+</sup>CCR6<sup>-</sup> (containing classic T<sub>H1</sub> cells) and CD4<sup>+</sup>CCR6<sup>+</sup>  
18 (containing T<sub>H1</sub><sup>\*</sup> *Mycobacterium*-responsive cells) memory subsets (Geiger et al., 2009).  
19 Consistent with our *in vivo* findings, the T cells in the CD4<sup>+</sup>CCR6<sup>-</sup> and CD4<sup>+</sup>CCR6<sup>+</sup> libraries had  
20 low levels of CXCR3 or IFN- $\gamma$  (**Fig. S21D – G**). P's CD4<sup>+</sup>CCR6<sup>+</sup> T-cell library responded robustly  
21 to BCG, tetanus toxoid and *C. albicans*, and his CD4<sup>+</sup>CCR6<sup>-</sup> T-cell library responded normally to  
22 influenza virus, cytomegalovirus (CMV), and EBV (**Fig. S21H – N**). Despite intact proliferation,  
23 IFN- $\gamma$  production from T-bet-deficient T cells responding to influenza virus, EBV, tetanus toxoid,



1 and *C. albicans* was weak (**Fig. S21O – S**). However, P's CCR6<sup>+</sup> T cells, consisting almost entirely  
2 of *Mycobacterium*-specific memory T<sub>H1</sub>\* cells, proliferated robustly in response to BCG peptides.  
3 Moreover, their IFN- $\gamma$  production was normal (Acosta-Rodriguez et al., 2007; Becattini et al.,  
4 2015), and their levels of IL-10 production were slightly higher (**Fig. 6H and Fig. S21T**). The  
5 normal levels of IFN- $\gamma$  production could not be attributed to cells with a revertant genotype, as  
6 reported in other T-cell primary immunodeficiency diseases (PIDs), because the IFN- $\gamma$ <sup>+</sup> BCG-  
7 specific T-cell clones still carried the *TBX21* indel variant (data not shown) (Davis et al., 2008;  
8 Revy et al., 2019). Thus, the prolonged immunity to BCG infection mediated by V $\delta$ 2<sup>+</sup>  $\gamma\delta$  T and  
9 memory CD4<sup>+</sup> T cells was divergently controlled by T-bet, as T-bet was required for the generation  
10 of long-term immunity due to V $\delta$ 2<sup>+</sup>  $\gamma\delta$  T cells, but redundant for IFN- $\gamma$  production by BCG-  
11 specific cognate T<sub>H1</sub>\* cells.

## 1           **Discussion**

2           We report the identification and study of a patient with MSMD due to inherited, complete  
3 T-bet deficiency. Key observations made in T-bet-deficient mice were validated in this human  
4 patient with T-bet deficiency: 1) the development of T<sub>H</sub>1 cells and their production of effector  
5 cytokines, including IFN- $\gamma$  in particular, requires T-bet (Szabo et al., 2000, 2002); 2) the  
6 development of NK and iNKT cells is dependent on T-bet (Townsend et al., 2004) (**Table S8**); 3)  
7 the regulation of T-bet-dependent targets, including *CXCR3*, *TNF* and *IFNG*, involves both direct  
8 transactivation and epigenetic modulation (Miller and Weinmann, 2010). Accordingly, T-bet-  
9 deficient mice are highly vulnerable to mycobacteria, including *Mycobacterium tuberculosis* and  
10 *Mycobacterium avium* (Matsuyama et al., 2014; Sullivan et al., 2005), like mice deficient for other  
11 genes that govern IFN- $\gamma$  immunity (Casanova, 1999). By contrast, despite the requirement of T-  
12 bet for immunity against a broad spectrum of pathogens following experimental inoculation in  
13 mice, the only apparent infectious phenotype of the T-bet-deficient patient is MSMD (**Table S9**).  
14 Our study provides compelling evidence that inherited T-bet deficiency is a genetic etiology of  
15 MSMD due to the disruption of IFN- $\gamma$  immunity (Casanova et al., 2014). This experiment of nature  
16 suggests that T-bet is required for protective immunity to intramacrophagic mycobacteria but  
17 largely redundant for immunity to most intracellular pathogens, including viruses in particular.  
18 This is at odds with findings in mice, but consistent with other genetic etiologies of MSMD, all of  
19 which are inborn errors of IFN- $\gamma$  immunity (Boisson-Dupuis et al., 2018; Martínez-Barricarte et  
20 al., 2018; Rosain et al., 2019) (**Table S9**). Our observation further suggests that the functions of  
21 T-bet unrelated to IFN- $\gamma$  are redundant in humans. The identification of additional T-bet-deficient  
22 patients is required to draw firm conclusions. Yet, it is striking that humans genetically deprived

1 of key immunological molecules, other than T-bet or IFN- $\gamma$ , often show a much greater redundancy  
2 than the corresponding mutant mice (Casanova and Abel, 2004, 2018).

3 Our study also reveals unexpected immunological abnormalities not documented in T-bet-  
4 deficient mice that also contribute to the development of MSMD: 1) T-bet was required for the  
5 optimal development of two innate-like adaptive lineages of immune cells, MAIT and V $\delta$ 2<sup>+</sup>  $\gamma$  $\delta$  T  
6 cells; 2) T-bet was also required for the production of IFN- $\gamma$  by the few cells from these two subsets  
7 that were able to develop. Unexpectedly, IFN- $\gamma$  production by cognate purely adaptive  
8 *Mycobacterium*-specific T<sub>H</sub>1\* CD4<sup>+</sup> T cells was unaffected by T-bet deficiency. Taken together,  
9 impaired IFN- $\gamma$  production by NK and iNKT cells, as in mice, and by MAIT and V $\delta$ 2<sup>+</sup>  $\gamma$  $\delta$  T cells,  
10 as shown here, accounts for MSMD in this patient with T-bet deficiency, despite normal T<sub>H</sub>1\*  
11 development and function. By contrast, inborn errors of immunity that disrupt IFN- $\gamma$  production  
12 by selective depletion of NK, iNKT, CD4<sup>+</sup>, or CD8<sup>+</sup>  $\alpha$  $\beta$ T cells do not underlie mycobacterial  
13 disease, because of the compensation provided by other subsets (**Table S2**). Conversely, the loss  
14 of all T-cell subsets in severe combined immunodeficiency does result in predisposition to  
15 mycobacterial disease. Interestingly, a different combination of deficits accounts for MSMD in  
16 patients with ROR $\gamma$ T deficiency, who lack iNKT and MAIT cells and whose  $\gamma$  $\delta$  T and T<sub>H</sub>1\* cells  
17 do not produce IFN- $\gamma$ , while their NK cells are unable to compensate (Okada et al., 2015). T-bet  
18 and ROR $\gamma$ T deficiencies are characterized by iNKT, MAIT, and  $\gamma$  $\delta$  T-cell deficiencies, whereas  
19 an NK deficit is observed only in T-bet deficiency and a deficit of T<sub>H</sub>1\* cells is observed only in  
20 ROR $\gamma$ T deficiency. We found that human T-bet was essential for both innate (NK cells) and innate-  
21 like (iNKT, MAIT, and V $\delta$ 2<sup>+</sup>  $\gamma$  $\delta$  T cells) adaptive immunity to mycobacteria, but surprisingly  
22 redundant for classical, purely adaptive immunity (T<sub>H</sub>1\*) to mycobacteria.

23

## Acknowledgments

We thank the patients and their families; the members of the laboratory for helpful discussions; Tatiana Kochetkov for technical assistance; Benedetta Bigio for computing support; Cecilia Lindestam Arlehamn and Alessandro Sette for providing peptide pools, and Dominick Papandrea, Yelena Nemirovskaya, Mark Woollett, and Cécile Patissier for administrative assistance. We also thank the Flow Cytometry Resource Center for technical support and the Rockefeller University Hospital for patient-oriented support. These institutions are supported in part by the National Center for Advancing Translational Sciences of the National Institutes of Health (UL1TR001866 to Rockefeller University). We also thank Steven Elledge (Brigham and Women's Hospital, Harvard Medical School, Boston, MA, USA) for kindly providing the VirScan phage library used here for antibody profiling. This work was funded by the National Institute of Allergy and Infectious Diseases (R37AI095983 to J.L.C and U19AI118626 to F.S.), the Sackler Center for Biomedicine and Nutrition at the Center for Clinical and Translational Science, the Shapiro-Silverberg Fund for the Advancement of Translational Research at the Center for Clinical and Translational Science of the Rockefeller University (to R.Y.), the Research Grant Program of the Immune Deficiency Foundation (to R.Y.), the Integrative Biology of Emerging Infectious Diseases Laboratory of Excellence (ANR-10-LABX-62-IBEID) and the French National Research Agency under the “Investments for the future” program (ANR-10-IAHU-01), ANR-GENMSMD (ANR-16-CE17-0005-01 to J.B.), ANR-LTh-MSMD-CMCD (ANR-18-CE93-0008-01 to A.P), *Fonds de Recherche en Santé Respiratoire* (SRC2017 to J.B.), the French Foundation for Medical Research (FRM) (EQU201903007798), the SCOR Corporate Foundation for Science, ECOS Nord (C19S01-63407 to J.B.), the Swiss National Science Foundation (310030L\_182728 to F.S.), the French Foundation for Medical Research (FRM) (EQU201903007798), the SCOR Corporate Foundation for Science, the St. Giles Foundation, the Rockefeller University, Howard Hughes Medical Institute, *Institut National de la Santé et de la Recherche Médicale* (INSERM), the Helmut Horten Foundation, Sidra Medicine and Paris Descartes University. The Canadian Center for Computational Genomics (C3G) is a Genomics Technology Platform (GTP) supported by the Canadian Government through Genome Canada. J. R. was supported by an INSERM *Poste d'accueil*. T.K. was supported by the Qatar National Research Fund (PPM1-1220-150017). S.G.T. was supported by a Program grant (1113904) and Principal Research Fellowship (1042925) awarded by the National Health and Medical Research Council of Australia. C.S.M. is supported by an Early/Mid-Career Development Research Fellowship (to C.S.M.) from the Ministry of Health of the NSW Government. R.Y. was supported in part by the Stony Wold-Herbert Fund and the Immune Deficiency Foundation.

1  
2  
3  
4  
5  
6  
7  
8  
9  
10  
11  
12  
13  
14  
15  
16  
17  
18  
19  
20  
21  
22  
23  
24  
25  
26  
27  
28  
29  
30  
31  
32  
33  
34  
35

## 1 Reference

- 2 Acosta-Rodriguez, E. V, Rivino, L., Geginat, J., Jarrossay, D., Gattorno, M., Lanzavecchia, A.,  
3 Sallusto, F., and Napolitani, G. (2007). Surface phenotype and antigenic specificity of human  
4 interleukin 17-producing T helper memory cells. *Nat. Immunol.* 8, 639–646.
- 5 Amir el, A.D., Davis, K.L., Tadmor, M.D., Simonds, E.F., Levine, J.H., Bendall, S.C., Shenfeld,  
6 D.K., Krishnaswamy, S., Nolan, G.P., and Pe'er, D. (2013). viSNE enables visualization of high  
7 dimensional single-cell data and reveals phenotypic heterogeneity of leukemia. *Nat Biotechnol*  
8 31, 545–552.
- 9 Becattini, S., Latorre, D., Mele, F., Foglierini, M., De Gregorio, C., Cassotta, A., Fernandez, B.,  
10 Kelderman, S., Schumacher, T.N., Corti, D., et al. (2015). T cell immunity. Functional  
11 heterogeneity of human memory CD4(+) T cell clones primed by pathogens or vaccines. *Science*  
12 (80- ). 347, 400–406.
- 13 Becht, E., McInnes, L., Healy, J., Dutertre, C.-A., Kwok, I.W.H., Ng, L.G., Ginhoux, F., and  
14 Newell, E.W. (2019). Dimensionality reduction for visualizing single-cell data using UMAP.  
15 *Nat. Biotechnol.* 37, 38–44.
- 16 Bettelli, E., Sullivan, B., Szabo, S.J., Sobel, R.A., Glimcher, L.H., and Kuchroo, V.K. (2004).  
17 Loss of T-bet, but not STAT1, prevents the development of experimental autoimmune  
18 encephalomyelitis. *J Exp Med* 200, 79–87.
- 19 Björkström, N.K., Ljunggren, H.-G., and Sandberg, J.K. (2010). CD56 negative NK cells: origin,  
20 function, and role in chronic viral disease. *Trends Immunol.* 31, 401–406.
- 21 Bogunovic, D., Byun, M., Durfee, L.A., Abhyankar, A., Sanal, O., Mansouri, D., Salem, S.,  
22 Radovanovic, I., Grant, A. V, Adimi, P., et al. (2012). Mycobacterial disease and impaired IFN-  
23 gamma immunity in humans with inherited ISG15 deficiency. *Science* (80- ). 337, 1684–1688.
- 24 Boisson-Dupuis, S., Ramirez-Alejo, N., Li, Z., Patin, E., Rao, G., Kerner, G., Lim, C.K.,  
25 Kremontsov, D.N., Hernandez, N., Ma, C.S., et al. (2018). Tuberculosis and impaired IL-23-  
26 dependent IFN- $\gamma$  immunity in humans homozygous for a common TYK2 missense variant. *Sci.*  
27 *Immunol.* 3, eaau8714.
- 28 Bustamante, J., Boisson-Dupuis, S., Abel, L., and Casanova, J.L. (2014). Mendelian  
29 susceptibility to mycobacterial disease: genetic, immunological, and clinical features of inborn  
30 errors of IFN-gamma immunity. *Semin Immunol* 26, 454–470.
- 31 Casanova, J.-L. (2015a). Severe infectious diseases of childhood as monogenic inborn errors of  
32 immunity. *Proc. Natl. Acad. Sci.*
- 33 Casanova, J.-L. (2015b). Human genetic basis of interindividual variability in the course of  
34 infection. *Proc. Natl. Acad. Sci.*
- 35 Casanova, J.L. (1999). IL-12 and IFN- $\gamma$  in host defense against mycobacteria and salmonella in  
36 mice and men. *Curr. Opin. Immunol.* 11, 346–351.
- 37 Casanova, J.L., and Abel, L. (2004). The human model: A genetic dissection of immunity to  
38 infection in natural conditions. *Nat. Rev. Immunol.* 4, 55–66.
- 39 Casanova, J.L., and Abel, L. (2018). Human genetics of infectious diseases: Unique insights into  
40 immunological redundancy. *Semin. Immunol.* 36, 1–12.
- 41 Casanova, J.-L., Conley, M.E., Seligman, S.J., Abel, L., and Notarangelo, L.D. (2014).  
42 Guidelines for genetic studies in single patients: lessons from primary immunodeficiencies. *J.*  
43 *Exp. Med.* 211, 2137–2149.
- 44 Casanova, J.L., Jouanguy, E., Lamhamedi, S., Blanche, S., and Fischer, A. (1995).  
45 Immunological conditions of children with BCG disseminated infection. *Lancet* (London,  
46 England) 346, 581.

- 1 Casey, J.P., Nobbs, M., McGettigan, P., Lynch, S., and Ennis, S. (2012). Recessive mutations in
- 2 MCM4/PRKDC cause a novel syndrome involving a primary immunodeficiency and a disorder
- 3 of DNA repair. *J. Med. Genet.* *49*, 242–245.
- 4 Chen, Z.W. (2005). Immune regulation of gammadelta T cell responses in mycobacterial
- 5 infections. *Clin. Immunol.* *116*, 202–207.
- 6 Chen, X., and Prywes, R. (1999). Serum-induced expression of the *cdc25A* gene by relief of
- 7 E2F-mediated repression. *Mol. Cell. Biol.* *19*, 4695–4702.
- 8 Chen, L., He, W., Kim, S.T., Tao, J., Gao, Y., Chi, H., Intlekofer, A.M., Harvey, B., Reiner,
- 9 S.L., Yin, Z., et al. (2007). Epigenetic and Transcriptional Programs Lead to Default IFN- $\gamma$
- 10 Production by  $\gamma\delta$  T Cells. *J. Immunol.* *178*, 2730–2736.
- 11 Chien, Y., Meyer, C., and Bonneville, M. (2014).  $\gamma\delta$  T Cells: First Line of Defense and Beyond.
- 12 *Annu. Rev. Immunol.* *32*, 121–155.
- 13 Consortium, T. 1000 G.P. (2015). A global reference for human genetic variation. *Nature* *526*,
- 14 68–74.
- 15 Corces, M.R., Trevino, A.E., Hamilton, E.G., Greenside, P.G., Sinnott-Armstrong, N.A.,
- 16 Vesuna, S., Satpathy, A.T., Rubin, A.J., Montine, K.S., Wu, B., et al. (2017). An improved
- 17 ATAC-seq protocol reduces background and enables interrogation of frozen tissues. *Nat.*
- 18 *Methods* *14*, 959–962.
- 19 Cottineau, J., Kottemann, M.C., Lach, F.P., Kang, Y.-H., Vély, F., Deenick, E.K., Lazarov, T.,
- 20 Gineau, L., Wang, Y., Farina, A., et al. (2017). Inherited GINS1 deficiency underlies growth
- 21 retardation along with neutropenia and NK cell deficiency. *J. Clin. Invest.* *127*, 1991–2006.
- 22 Crosby, C.M., and Kronenberg, M. (2018). Tissue-specific functions of invariant natural killer T
- 23 cells. *Nat. Rev. Immunol.* *18*, 559–574.
- 24 Davis, B.R., Dicola, M.J., Prokopishyn, N.L., Rosenberg, J.B., Moratto, D., Muul, L.M.,
- 25 Candotti, F., and Michael Blaese, R. (2008). Unprecedented diversity of genotypic revertants in
- 26 lymphocytes of a patient with Wiskott-Aldrich syndrome. *Blood* *111*, 5064–5067.
- 27 Dorner, B.G., Scheffold, A., Rolph, M.S., Huser, M.B., Kaufmann, S.H.E., Radbruch, A., Flesch,
- 28 I.E.A., and Kroczyk, R.A. (2002). MIP-1 $\alpha$ , MIP-1 $\beta$ , RANTES, and ATAC/lymphotactin function
- 29 together with IFN- $\gamma$  as type 1 cytokines. *Proc. Natl. Acad. Sci.* *99*, 6181–6186.
- 30 Dorner, B.G., Steinbach, S., Hüser, M.B., Kroczyk, R.A., and Scheffold, A. (2003). Single-cell
- 31 analysis of the murine chemokines MIP-1 $\alpha$ , MIP-1 $\beta$ , RANTES and ATAC/lymphotactin
- 32 by flow cytometry. *J. Immunol. Methods* *274*, 83–91.
- 33 Dorner, B.G., Smith, H.R.C., French, A.R., Kim, S., Poursine-Laurent, J., Beckman, D.L.,
- 34 Pingel, J.T., Kroczyk, R.A., and Yokoyama, W.M. (2004). Coordinate Expression of Cytokines
- 35 and Chemokines by NK Cells during Murine Cytomegalovirus Infection. *J. Immunol.* *172*,
- 36 3119–3131.
- 37 Dupuis, S., Döffinger, R., Picard, C., Fieschi, C., Altare, F., Jouanguy, E., Abel, L., and
- 38 Casanova, J.L. (2000). Human interferon-gamma-mediated immunity is a genetically controlled
- 39 continuous trait that determines the outcome of mycobacterial invasion. *Immunol. Rev.* *178*,
- 40 129–137.
- 41 Garrett, W.S., Lord, G.M., Punit, S., Lugo-Villarino, G., Mazmanian, S.K., Ito, S., Glickman,
- 42 J.N., and Glimcher, L.H. (2007). Communicable ulcerative colitis induced by T-bet deficiency in
- 43 the innate immune system. *Cell* *131*, 33–45.
- 44 Gavins, F.N.E., and Hickey, M.J. (2012). Annexin A1 and the regulation of innate and adaptive
- 45 immunity. *Front. Immunol.* *3*, 354.
- 46 Geiger, R., Duhon, T., Lanzavecchia, A., and Sallusto, F. (2009). Human naive and memory

- 1 CD4<sup>+</sup> T cell repertoires specific for naturally processed antigens analyzed using libraries of
- 2 amplified T cells. *J. Exp. Med.* *206*, 1525–1534.
- 3 Gineau, L., Cognet, C., Kara, N., Lach, F.P., Dunne, J., Veturi, U., Picard, C., Trouillet, C.,
- 4 Eidenschenk, C., Aoufouchi, S., et al. (2012). Partial MCM4 deficiency in patients with growth
- 5 retardation, adrenal insufficiency, and natural killer cell deficiency. *J. Clin. Invest.* *122*, 821–832.
- 6 Godfrey, D.I., Koay, H.-F., McCluskey, J., and Gherardin, N.A. (2019). The biology and
- 7 functional importance of MAIT cells. *Nat. Immunol.* *20*, 1110–1128.
- 8 Gokmen, M.R., Dong, R., Kanhere, A., Powell, N., Perucha, E., Jackson, I., Howard, J.K.,
- 9 Hernandez-Fuentes, M., Jenner, R.G., and Lord, G.M. (2013). Genome-Wide Regulatory
- 10 Analysis Reveals That T-bet Controls Th17 Lineage Differentiation through Direct Suppression
- 11 of IRF4. *J. Immunol.*
- 12 Groom, J.R., and Luster, A.D. (2011). CXCR3 in T cell function. *Exp. Cell Res.* *317*, 620–631.
- 13 Gu, S., Borowska, M.T., Boughter, C.T., and Adams, E.J. (2018). Butyrophilin3A proteins and
- 14 V $\gamma$ 9V $\delta$ 2 T cell activation. *Semin. Cell Dev. Biol.* *84*, 65–74.
- 15 Hambleton, S., Salem, S., Bustamante, J., Bigley, V., Boisson-Dupuis, S., Azevedo, J., Fortin,
- 16 A., Haniffa, M., Ceron-Gutierrez, L., Bacon, C.M., et al. (2011). IRF8 Mutations and Human
- 17 Dendritic-Cell Immunodeficiency. *N. Engl. J. Med.*
- 18 Harly, C., Guillaume, Y., Nedellec, S., Peigne, C.M., Monkkonen, H., Monkkonen, J., Li, J.,
- 19 Kuball, J., Adams, E.J., Netzer, S., et al. (2012). Key implication of CD277/butyrophilin-3
- 20 (BTN3A) in cellular stress sensing by a major human gammadelta T-cell subset. *Blood* *120*,
- 21 2269–2279.
- 22 Hoft, D.F., Brown, R.M., and Roodman, S.T. (1998). Bacille Calmette-Guerin vaccination
- 23 enhances human gamma delta T cell responsiveness to mycobacteria suggestive of a memory-
- 24 like phenotype. *J Immunol* *161*, 1045–1054.
- 25 Hughes, C.R., Guasti, L., Meimaridou, E., Chuang, C.-H., Schimenti, J.C., King, P.J., Costigan,
- 26 C., Clark, A.J.L., and Metherell, L.A. (2012). MCM4 mutation causes adrenal failure, short
- 27 stature, and natural killer cell deficiency in humans. *J. Clin. Invest.* *122*, 814–820.
- 28 Itan, Y., Zhang, S.-Y., Vogt, G., Abhyankar, A., Herman, M., Nitschke, P., Fried, D., Quintana-
- 29 Murci, L., Abel, L., and Casanova, J.-L. (2013). The human gene connectome as a map of short
- 30 cuts for morbid allele discovery. *Proc. Natl. Acad. Sci.* *110*, 5558–5563.
- 31 Itan, Y., Mazel, M., Mazel, B., Abhyankar, A., Nitschke, P., Quintana-Murci, L., Boisson-
- 32 Dupuis, S., Boisson, B., Abel, L., Zhang, S.-Y., et al. (2014). HGCS: an online tool for
- 33 prioritizing disease-causing gene variants by biological distance. *BMC Genomics* *15*, 256.
- 34 Itan, Y., Shang, L., Boisson, B., Patin, E., Bolze, A., Moncada-Velez, M., Scott, E., Ciancanelli,
- 35 M.J., Lafaille, F.G., Markle, J.G., et al. (2015). The human gene damage index as a gene-level
- 36 approach to prioritizing exome variants. *Proc Natl Acad Sci U S A* *112*, 13615–13620.
- 37 Itan, Y., Shang, L., Boisson, B., Ciancanelli, M.J., Markle, J.G., Martinez-Barricarte, R., Scott,
- 38 E., Shah, I., Stenson, P.D., Gleeson, J., et al. (2016). The mutation significance cutoff: gene-level
- 39 thresholds for variant predictions. *Nat Methods* *13*, 109–110.
- 40 Iwata, S., Mikami, Y., Sun, H.-W., Brooks, S.R., Jankovic, D., Hirahara, K., Onodera, A., Shih,
- 41 H.-Y., Kawabe, T., Jiang, K., et al. (2017). The Transcription Factor T-bet Limits Amplification
- 42 of Type I IFN Transcriptome and Circuitry in T Helper 1 Cells. *Immunity* *46*, 983-991.e4.
- 43 Janesick, A., Shiotsugu, J., Taketani, M., and Blumberg, B. (2012). RIPPLY3 is a retinoic acid-
- 44 inducible repressor required for setting the borders of the pre-placodal ectoderm. *Development*
- 45 *139*, 1213–1224.
- 46 Jang, E.J., Park, H.R., Hong, J.H., and Hwang, E.S. (2013). Lysine 313 of T-box is crucial for

- 1 modulation of protein stability, DNA binding, and threonine phosphorylation of T-bet. *J*  
2 *Immunol* *190*, 5764–5770.
- 3 Jenner, R.G., Townsend, M.J., Jackson, I., Sun, K., Bouwman, R.D., Young, R.A., Glimcher,  
4 L.H., and Lord, G.M. (2009). The transcription factors T-bet and GATA-3 control alternative  
5 pathways of T-cell differentiation through a shared set of target genes. *Proc. Natl. Acad. Sci. U.*  
6 *S. A.* *106*, 17876–17881.
- 7 Juedes, A.E., Rodrigo, E., Togher, L., Glimcher, L.H., and von Herrath, M.G. (2004). T-bet  
8 controls autoaggressive CD8 lymphocyte responses in type 1 diabetes. *J Exp Med* *199*, 1153–  
9 1162.
- 10 Kanhere, A., Hertweck, A., Bhatia, U., Gökmen, M.R., Perucha, E., Jackson, I., Lord, G.M., and  
11 Jenner, R.G. (2012). T-bet and GATA3 orchestrate Th1 and Th2 differentiation through lineage-  
12 specific targeting of distal regulatory elements. *Nat. Commun.* *3*, 1268.
- 13 Karczewski, K., Francioli, L., Tiao, G., Cummings, B., Alföldi, J., Wang, Q., Collins, R.,  
14 Laricchia, K., Ganna, A., Birnbaum, D., et al. (2019). Variation across 141,456 human exomes  
15 and genomes reveals the spectrum of loss-of-function intolerance across human protein-coding  
16 genes: Supplementary Information.
- 17 Kircher, M., Witten, D.M., Jain, P., O’Roak, B.J., Cooper, G.M., and Shendure, J. (2014). A  
18 general framework for estimating the relative pathogenicity of human genetic variants. *Nat*  
19 *Genet* *46*, 310–315.
- 20 Kjer-Nielsen, L., Patel, O., Corbett, A.J., Nours, J. Le, Meehan, B., Liu, L., Bhati, M., Chen, Z.,  
21 Kostenko, L., Reantragoon, R., et al. (2012). MR1 presents microbial vitamin B metabolites to  
22 MAIT cells \_ *Nature* \_ *Nature Research*. *Nature*.
- 23 Koch, M.A., Tucker-Heard, G., Perdue, N.R., Killebrew, J.R., Urdahl, K.B., and Campbell, D.J.  
24 (2009). The transcription factor T-bet controls regulatory T cell homeostasis and function during  
25 type 1 inflammation. *Nat. Immunol.* *10*, 595–602.
- 26 Kong, X.F., Martinez-Barricarte, R., Kennedy, J., Mele, F., Lazarov, T., Deenick, E.K., Ma,  
27 C.S., Breton, G., Lucero, K.B., Langlais, D., et al. (2018). Disruption of an antimycobacterial  
28 circuit between dendritic and helper T cells in human SPPL2a deficiency. *Nat Immunol* *19*, 973–  
29 985.
- 30 Kroczyk, R.A., and Henn, V. (2012). The Role of XCR1 and its Ligand XCL1 in Antigen Cross-  
31 Presentation by Murine and Human Dendritic Cells. *Front. Immunol.* *3*, 14.
- 32 Latour, S. (2007). Natural killer T cells and X-linked lymphoproliferative syndrome. *Curr. Opin.*  
33 *Allergy Clin. Immunol.* *7*, 510–514.
- 34 Lazarevic, V., Chen, X., Shim, J.H., Hwang, E.S., Jang, E., Bolm, A.N., Oukka, M., Kuchroo,  
35 V.K., and Glimcher, L.H. (2011). T-bet represses TH 17 differentiation by preventing Runx1-  
36 mediated activation of the gene encoding ROR $\gamma$ t. *Nat. Immunol.*
- 37 Lazarevic, V., Glimcher, L.H., and Lord, G.M. (2013). T-bet: a bridge between innate and  
38 adaptive immunity. *Nat Rev Immunol* *13*, 777–789.
- 39 Levine, A.G., Mendoza, A., Hemmers, S., Moltedo, B., Niec, R.E., Schizas, M., Hoyos, B.E.,  
40 Putintseva, E. V., Chaudhry, A., Dikiy, S., et al. (2017). Stability and function of regulatory T  
41 cells expressing the transcription factor T-bet. *Nature* *546*, 421–425.
- 42 Lewis, M.D., Miller, S.A., Miazgowiec, M.M., Beima, K.M., and Weinmann, A.S. (2007). T-  
43 bet’s ability to regulate individual target genes requires the conserved T-box domain to recruit  
44 histone methyltransferase activity and a separate family member-specific transactivation domain.  
45 *Mol. Cell. Biol.* *27*, 8510–8521.
- 46 Lim, A.I., Li, Y., Lopez-Lastra, S., Stadhouders, R., Paul, F., Casrouge, A., Serafini, N., Puel,



- 1 A., Bustamante, J., Surace, L., et al. (2017). Systemic Human ILC Precursors Provide a Substrate  
2 for Tissue ILC Differentiation. *Cell* *168*, 1086-1100.e10.
- 3 Locci, M., Ghici, E.D., Marangoni, F., Bosticardo, M., Catucci, M., Aiuti, A., Cancrini, C.,  
4 Marodi, L., Espanol, T., Bredius, R.G.M., et al. (2009). The Wiskott-Aldrich syndrome protein is  
5 required for iNKT cell maturation and function. *J. Exp. Med.* *206*, 735–742.
- 6 Loetscher, P., Ugucioni, M., Bordoli, L., Baggiolini, M., Moser, B., Chizzolini, C., and Dayer,  
7 J.-M. (1998). CCR5 is characteristic of Th1 lymphocytes. *Nature* *391*, 344–345.
- 8 Lund, R., Ahlfors, H., Kainonen, E., Lahesmaa, A.-M., Dixon, C., and Lahesmaa, R. (2005).  
9 Identification of genes involved in the initiation of human Th1 or Th2 cell commitment. *Eur. J.*  
10 *Immunol.* *35*, 3307–3319.
- 11 Martínez-Barricarte, R., Markle, J.G., Ma, C.S., Deenick, E.K., Ramírez-Alejo, N., Mele, F.,  
12 Latorre, D., Mahdavian, S.A., Aytakin, C., Mansouri, D., et al. (2018). Human IFN- immunity  
13 to mycobacteria is governed by both IL-12 and IL-23. *Sci. Immunol.*
- 14 Matsuyama, M., Ishii, Y., Yageta, Y., Ohtsuka, S., Ano, S., Matsuno, Y., Morishima, Y., Yoh,  
15 K., Takahashi, S., Ogawa, K., et al. (2014). Role of Th1/Th17 balance regulated by T-bet in a  
16 mouse model of Mycobacterium avium complex disease. *J Immunol* *192*, 1707–1717.
- 17 Miller, S.A., and Weinmann, A.S. (2010). Molecular mechanisms by which T-bet regulates T-  
18 helper cell commitment. *Immunol Rev* *238*, 233–246.
- 19 Modlin, R.L., Pirmez, C., Hofman, F.M., Torigian, V., Uyemura, K., Rea, T.H., Bloom, B.R.,  
20 and Brenner, M.B. (1989). Lymphocytes bearing antigen-specific  $\gamma\delta$  T-cell receptors accumulate  
21 in human infectious disease lesions. *Nature* *339*, 544–548.
- 22 Morgan, N. V., Goddard, S., Cardno, T.S., McDonald, D., Rahman, F., Barge, D., Ciupek, A.,  
23 Straatman-Iwanowska, A., Pasha, S., Guckian, M., et al. (2011). Mutation in the TCR $\alpha$  subunit  
24 constant gene (TRAC) leads to a human immunodeficiency disorder characterized by a lack of  
25 TCR $\beta$ + T cells. *J. Clin. Invest.* *121*, 695–702.
- 26 Nathan, C.F., Murray, H.W., Wiebe, M.E., and Rubin, B.Y. (1983). Identification of interferon-  
27 gamma as the lymphokine that activates human macrophage oxidative metabolism and  
28 antimicrobial activity. *J Exp Med* *158*, 670–689.
- 29 Nishikomori, R., Usui, T., Wu, C.-Y., Morinobu, A., O’Shea, J.J., and Strober, W. (2002).  
30 Activated STAT4 has an essential role in Th1 differentiation and proliferation that is  
31 independent of its role in the maintenance of IL-12R beta 2 chain expression and signaling. *J.*  
32 *Immunol.* *169*, 4388–4398.
- 33 Okada, S., Markle, J.G., Deenick, E.K., Mele, F., Averbuch, D., Lagos, M., Alzahrani, M., Al-  
34 Muhsen, S., Halwani, R., Ma, C.S., et al. (2015). Impairment of immunity to Candida and  
35 Mycobacterium in humans with bi-allelic RORC mutations. *Science* (80-. ). *349*, 606–613.
- 36 Panchamoorthy, G., McLean, J., Modlin, R.L., Morita, C.T., Ishikawa, S., Brenner, M.B., and  
37 Band, H. (1991). A predominance of the T cell receptor V gamma 2/V delta 2 subset in human  
38 mycobacteria-responsive T cells suggests germline gene encoded recognition. *J. Immunol.* *147*,  
39 3360–3369.
- 40 Parker, C.M., Groh, V., Band, H., Porcelli, S.A., Morita, C., Fabbi, M., Glass, D., Strominger,  
41 J.L., and Brenner, M.B. (1990). Evidence for extrathymic changes in the T cell receptor  
42 gamma/delta repertoire. *J. Exp. Med.* *171*, 1597–1612.
- 43 Petrovski, S., Gussow, A.B., Wang, Q., Halvorsen, M., Han, Y., Weir, W.H., Allen, A.S., and  
44 Goldstein, D.B. (2015). The Intolerance of Regulatory Sequence to Genetic Variation Predicts  
45 Gene Dosage Sensitivity. *PLoS Genet* *11*, e1005492.
- 46 Powell, N., Walker, A.W., Stolarczyk, E., Canavan, J.B., Gökmen, M.R., Marks, E., Jackson, I.,

- 1 Hashim, A., Curtis, M.A., Jenner, R.G., et al. (2012). The Transcription Factor T-bet Regulates  
2 Intestinal Inflammation Mediated by Interleukin-7 Receptor+ Innate Lymphoid Cells. *Immunity*  
3 *37*, 674–684.
- 4 Revy, P., Kannengiesser, C., and Fischer, A. (2019). Somatic genetic rescue in Mendelian  
5 haematopoietic diseases. *Nat. Rev. Genet.* *20*, 582–598.
- 6 Rosain, J., Kong, X.F., Martinez-Barricarte, R., Oleaga-Quintas, C., Ramirez-Alejo, N., Markle,  
7 J., Okada, S., Boisson-Dupuis, S., Casanova, J.L., and Bustamante, J. (2019). Mendelian  
8 susceptibility to mycobacterial disease: 2014–2018 update. *Immunol. Cell Biol.*
- 9 Salem, S., Langlais, D., Lefebvre, F., Bourque, G., Bigley, V., Haniffa, M., Casanova, J.-L.,  
10 Burk, D., Berghuis, A., Butler, K.M., et al. (2014). Functional characterization of the human  
11 dendritic cell immunodeficiency associated with the IRF8(K108E) mutation. *Blood* *124*, 1894–  
12 1904.
- 13 Sallusto, F., Lenig, D., Mackay, C.R., and Lanzavecchia, A. (1998). Flexible Programs of  
14 Chemokine Receptor Expression on Human Polarized T Helper 1 and 2 Lymphocytes. *J. Exp.*  
15 *Med.* *187*, 875–883.
- 16 Scott, E.M., Halees, A., Itan, Y., Spencer, E.G., He, Y., Azab, M.A., Gabriel, S.B., Belkadi, A.,  
17 Boisson, B., Abel, L., et al. (2016). Characterization of Greater Middle Eastern genetic variation  
18 for enhanced disease gene discovery. *Nat. Genet.* *48*, 1071–1076.
- 19 Shen, Y., Zhou, D., Qiu, L., Lai, X., Simon, M., Shen, L., Kou, Z., Wang, Q., Jiang, L., Estep, J.,  
20 et al. (2002). Adaptive immune response of Vgamma2Vdelta2+ T cells during mycobacterial  
21 infections. *Science (80-. )*. *295*, 2255–2258.
- 22 Soutto, M., Zhang, F., Enerson, B., Tong, Y., Boothby, M., and Aune, T.M. (2002). A minimal  
23 IFN-gamma promoter confers Th1 selective expression. *J Immunol* *169*, 4205–4212.
- 24 Sullivan, B.M., Juedes, A., Szabo, S.J., von Herrath, M., and Glimcher, L.H. (2003). Antigen-  
25 driven effector CD8 T cell function regulated by T-bet. *Proc. Natl. Acad. Sci.*
- 26 Sullivan, B.M., Jobe, O., Lazarevic, V., Vasquez, K., Bronson, R., Glimcher, L.H., and Kramnik,  
27 I. (2005). Increased susceptibility of mice lacking T-bet to infection with *Mycobacterium*  
28 *tuberculosis* correlates with increased IL-10 and decreased IFN-gamma production. *J Immunol*  
29 *175*, 4593–4602.
- 30 Szabo, S.J., Kim, S.T., Costa, G.L., Zhang, X., Fathman, C.G., and Glimcher, L.H. (2000). A  
31 novel transcription factor, T-bet, directs Th1 lineage commitment. *Cell* *100*, 655–669.
- 32 Szabo, S.J., Sullivan, B.M., Stemmann, C., Satoskar, A.R., Sleckman, B.P., and Glimcher, L.H.  
33 (2002). Distinct effects of T-bet in TH1 lineage commitment and IFN-gamma production in CD4  
34 and CD8 T cells. *Science (80-. )*. *295*, 338–342.
- 35 Taliun, D., Harris, D.N., Kessler, M.D., Carlson, J., Szpiech, Z.A., Torres, R., Taliun, S.A.G.,  
36 Corvelo, A., Gogarten, S.M., Kang, H.M., et al. (2019). Sequencing of 53,831 diverse genomes  
37 from the NHLBI TOPMed Program. *BioRxiv* 563866.
- 38 Tan, T.G., Mathis, D., and Benoist, C. (2016). Singular role for T-BET + CXCR3 + regulatory T  
39 cells in protection from autoimmune diabetes . *Proc. Natl. Acad. Sci.*
- 40 Tangye, S.G., Palendira, U., and Edwards, E.S.J. (2017). Human immunity against EBV—  
41 lessons from the clinic. *J. Exp. Med.* *214*, 269–283.
- 42 Tantisira, K.G., Hwang, E.S., Raby, B.A., Silverman, E.S., Lake, S.L., Richter, B.G., Peng, S.L.,  
43 Drazen, J.M., Glimcher, L.H., and Weiss, S.T. (2004). TBX21: a functional variant predicts  
44 improvement in asthma with the use of inhaled corticosteroids. *Proc Natl Acad Sci U S A* *101*,  
45 18099–18104.
- 46 Thieu, V.T., Yu, Q., Chang, H.-C., Yeh, N., Nguyen, E.T., Sehra, S., and Kaplan, M.H. (2008).

- 1 Signal transducer and activator of transcription 4 is required for the transcription factor T-bet to  
2 promote T helper 1 cell-fate determination. *Immunity* 29, 679–690.
- 3 Tong, Y., Aune, T., and Boothby, M. (2005a). T-bet antagonizes mSin3a recruitment and  
4 transactivates a fully methylated IFN- $\gamma$  promoter via a conserved T-box half-site. *Proc*  
5 *Natl Acad Sci U S A* 102, 2034–2039.
- 6 Tong, Y., Aune, T., and Boothby, M. (2005b). T-bet antagonizes mSin3a recruitment and  
7 transactivates a fully methylated IFN- promoter via a conserved T-box half-site. *Proc. Natl.*  
8 *Acad. Sci.*
- 9 Toribio-Fernández, R., Zorita, V., Rocha-Perugini, V., Iborra, S., Martínez del Hoyo, G., Chevre,  
10 R., Dorado, B., Sancho, D., Sanchez-Madrid, F., Andrés, V., et al. (2018). Lamin A/C augments  
11 Th1 differentiation and response against vaccinia virus and *Leishmania major*. *Cell Death Dis.* 9,  
12 9.
- 13 Townsend, M.J., Weinmann, A.S., Matsuda, J.L., Salomon, R., Farnham, P.J., Biron, C.A.,  
14 Gapin, L., and Glimcher, L.H. (2004). T-bet regulates the terminal maturation and homeostasis  
15 of NK and Valpha14i NKT cells. *Immunity* 20, 477–494.
- 16 Tsukaguchi, K., Balaji, K.N., and Boom, W.H. (1995). CD4+ alpha beta T cell and gamma delta  
17 T cell responses to *Mycobacterium tuberculosis*. Similarities and differences in Ag recognition,  
18 cytotoxic effector function, and cytokine production. *J. Immunol.* 154, 1786–1796.
- 19 Vavassori, S., Kumar, A., Wan, G.S., Ramanjaneyulu, G.S., Cavallari, M., El Daker, S., Beddoe,  
20 T., Theodossis, A., Williams, N.K., Gostick, E., et al. (2013). Butyrophilin 3A1 binds  
21 phosphorylated antigens and stimulates human gammadelta T cells. *Nat Immunol* 14, 908–916.
- 22 Velu, V., Mylvaganam, G.H., Gangadhara, S., Hong, J.J., Iyer, S.S., Gumber, S., Ibegbu, C.C.,  
23 Villinger, F., and Amara, R.R. (2016). Induction of Th1-Biased T Follicular Helper (Tfh) Cells  
24 in Lymphoid Tissues during Chronic Simian Immunodeficiency Virus Infection Defines  
25 Functionally Distinct Germinal Center Tfh Cells. *J. Immunol.* 197, 1832–1842.
- 26 Wilson, C.B., and Schoenborn, J.R. (2007). Regulation of Interferon- $\gamma$  During Innate and  
27 Adaptive Immune Responses. *Adv. Immunol.*
- 28 Xiao, X., and Cai, J. (2017). Mucosal-associated invariant T cells: New insights into antigen  
29 recognition and activation. *Front. Immunol.*
- 30 Yoshitomi, H., Kobayashi, S., Miyagawa-Hayashino, A., Okahata, A., Doi, K., Nishitani, K.,  
31 Murata, K., Ito, H., Tsuruyama, T., Haga, H., et al. (2018). Human Sox4 facilitates the  
32 development of CXCL13-producing helper T cells in inflammatory environments. *Nat.*  
33 *Commun.* 9, 3762.
- 34 Yu, J., Wei, M., Becknell, B., Trotta, R., Liu, S., Boyd, Z., Jaung, M.S., Blaser, B.W., Sun, J.,  
35 Benson Jr., D.M., et al. (2006). Pro- and antiinflammatory cytokine signaling: reciprocal  
36 antagonism regulates interferon- $\gamma$  production by human natural killer cells. *Immunity* 24,  
37 575–590.
- 38 Zhang, J., Liu, W., Wen, B., Xie, T., Tang, P., Hu, Y., Huang, L., Jin, K., Zhang, P., Liu, Z., et  
39 al. (2019a). Circulating CXCR3+ Tfh cells positively correlate with neutralizing antibody  
40 responses in HCV-infected patients. *Sci. Rep.* 9, 10090.
- 41 Zhang, P., Bigio, B., Rapaport, F., Zhang, S.-Y., Casanova, J.-L., Abel, L., Boisson, B., and Itan,  
42 Y. (2018). PopViz: a webserver for visualizing minor allele frequencies and damage prediction  
43 scores of human genetic variations. *Bioinformatics* 34, 4307–4309.
- 44 Zhang, X., Bogunovic, D., Payelle-Brogard, B., Francois-Newton, V., Speer, S.D., Yuan, C.,  
45 Volpi, S., Li, Z., Sanal, O., Mansouri, D., et al. (2015). Human intracellular ISG15 prevents  
46 interferon-alpha/beta over-amplification and auto-inflammation. *Nature* 517, 89–93.

- 1 Zhang, Y., Siegel, A.M., Sun, G., Dimaggio, T., Freeman, A.F., and Milner, J.D. (2019b).
- 2 Human TH9 differentiation is dependent on signal transducer and activator of transcription
- 3 (STAT) 3 to restrain STAT1-mediated inhibition. *J. Allergy Clin. Immunol.* *143*, 1108-1118.e4.
- 4 Zheng, W., and Flavell, R.A. (1997). The transcription factor GATA-3 is necessary and
- 5 sufficient for Th2 cytokine gene expression in CD4 T cells. *Cell* *89*, 587–596.
- 6 Zhu, J., Yamane, H., and Paul, W.E. (2010). Differentiation of Effector CD4 T Cell Populations.
- 7 *Annu. Rev. Immunol.* *28*, 445–489.
- 8

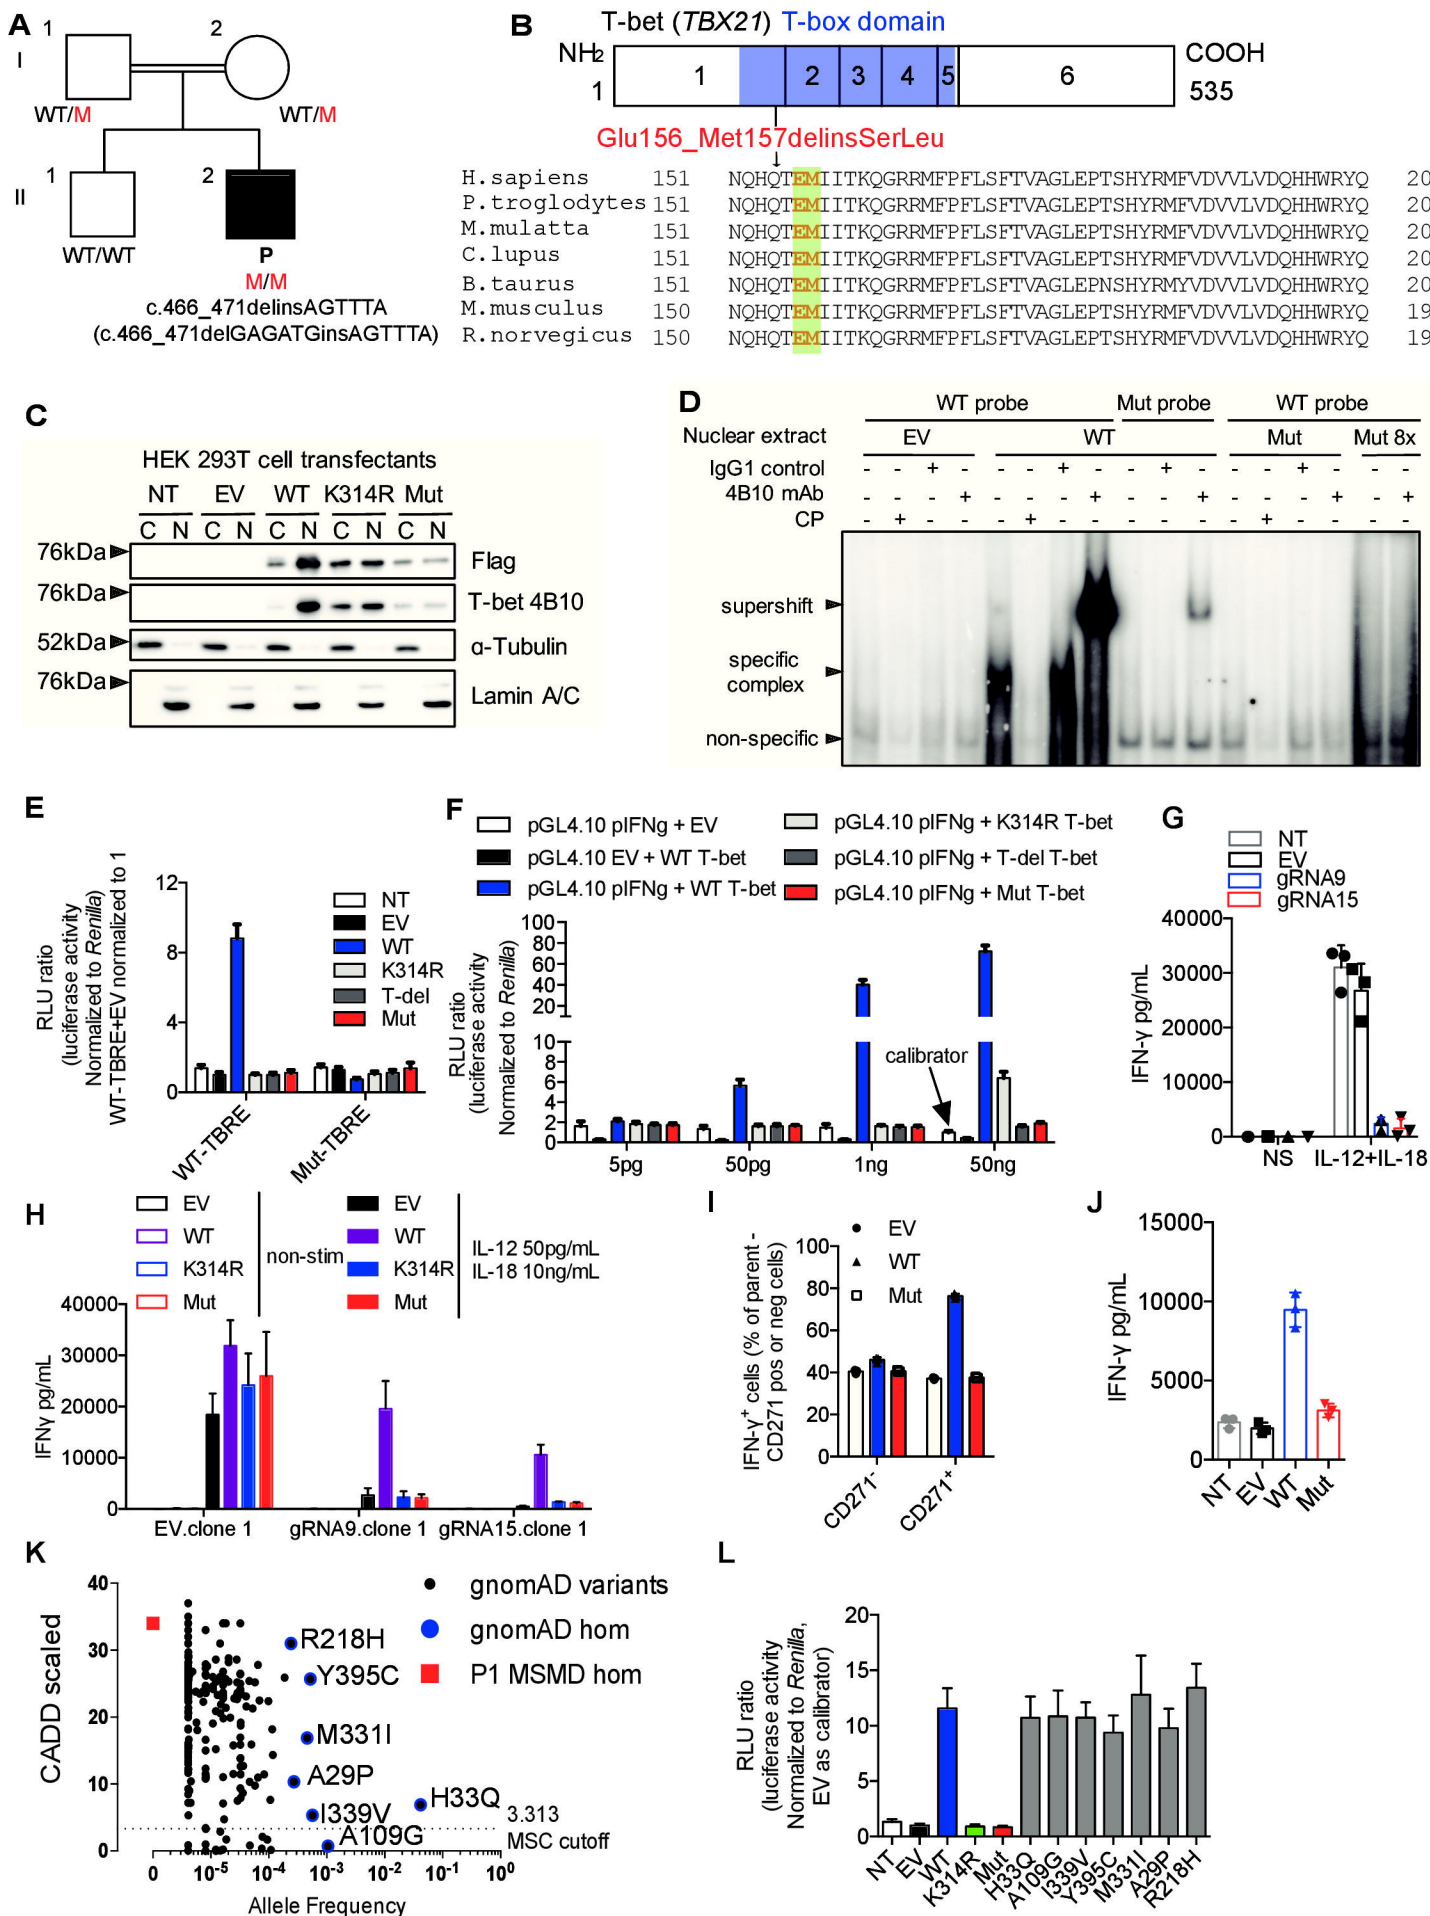

Figure 1

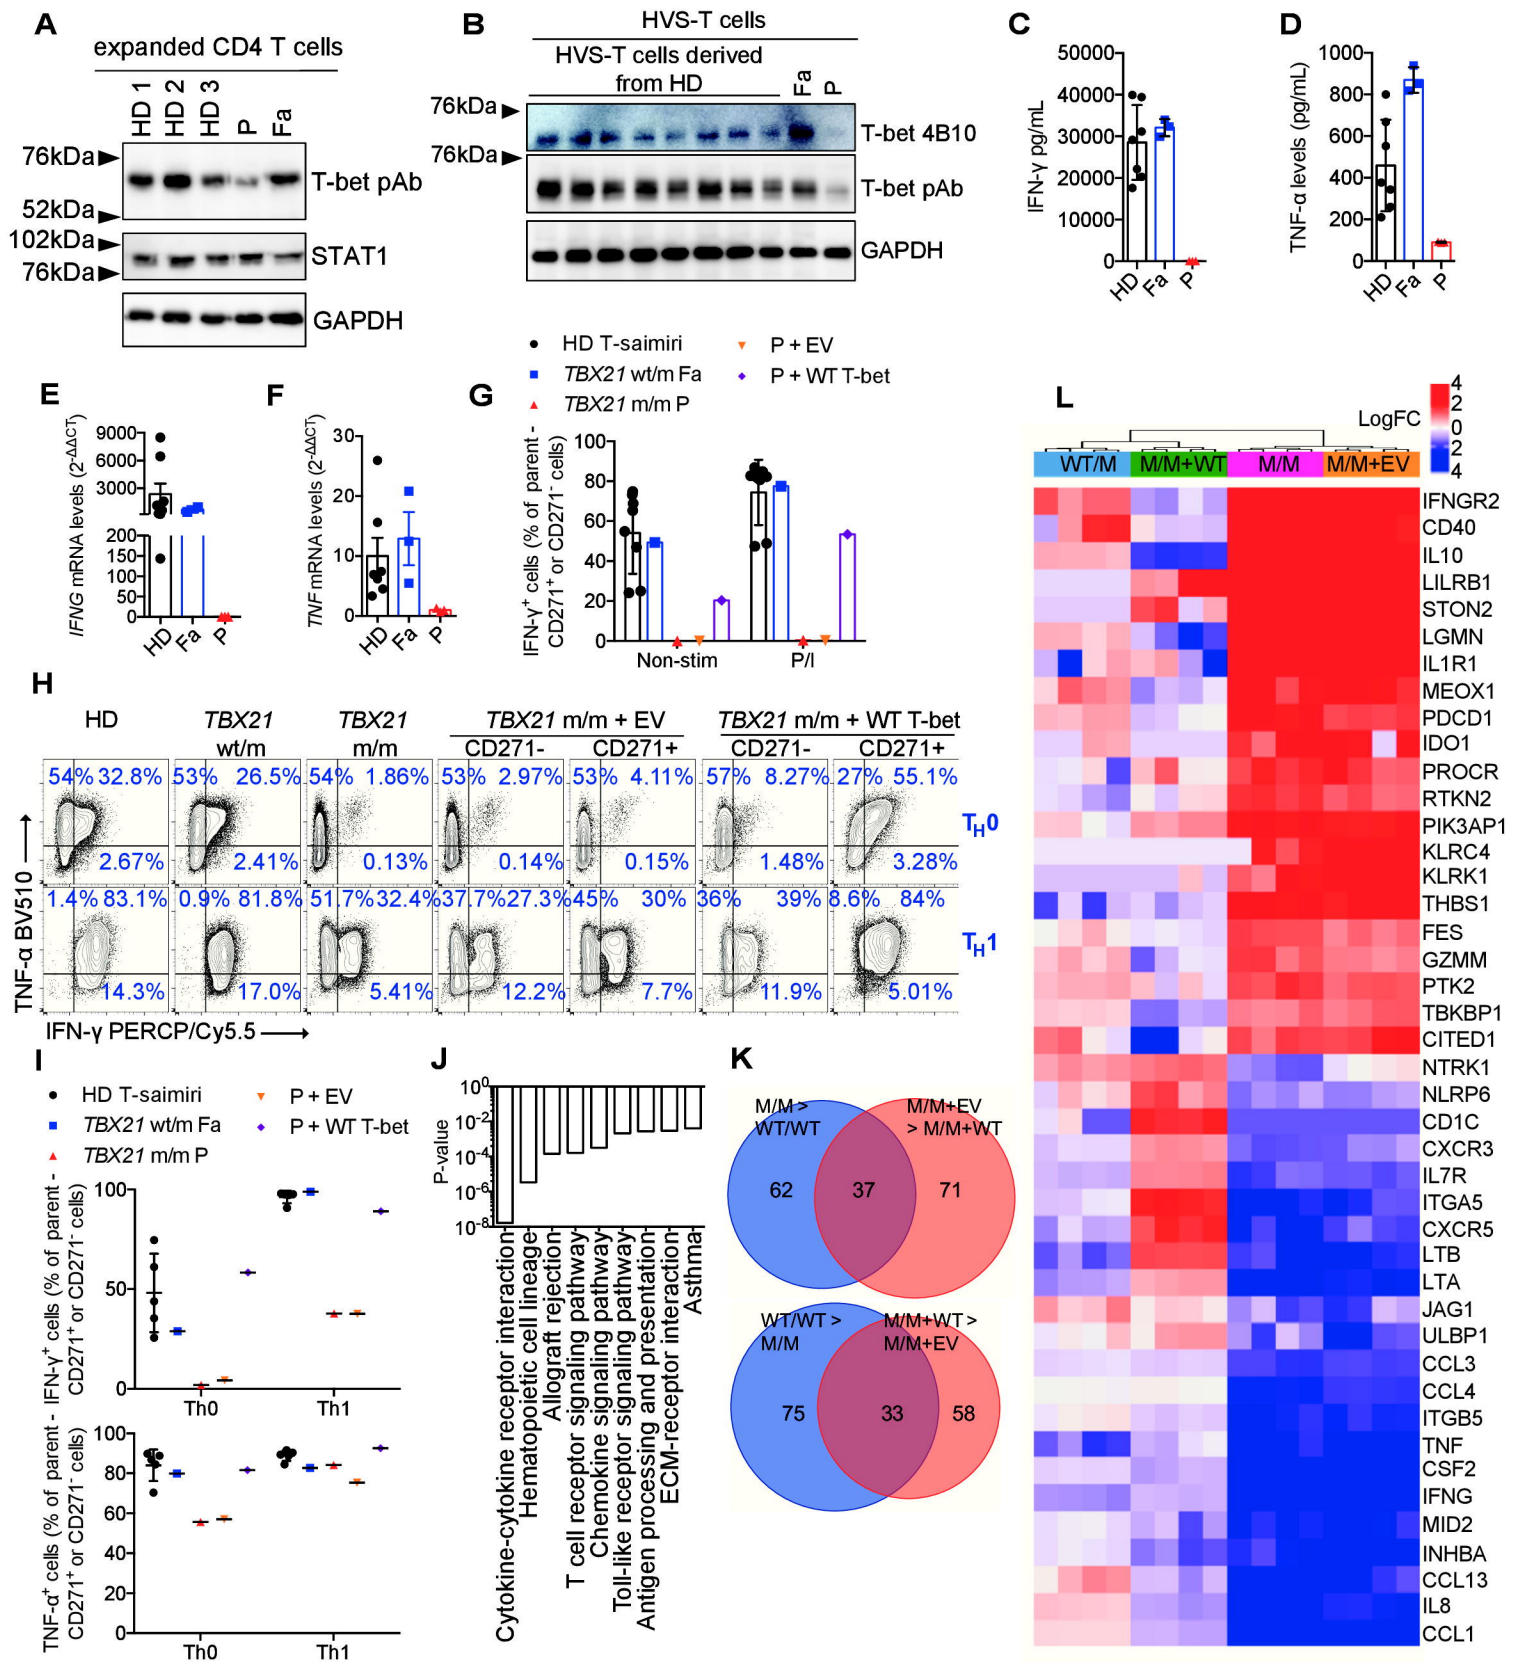

Figure 2

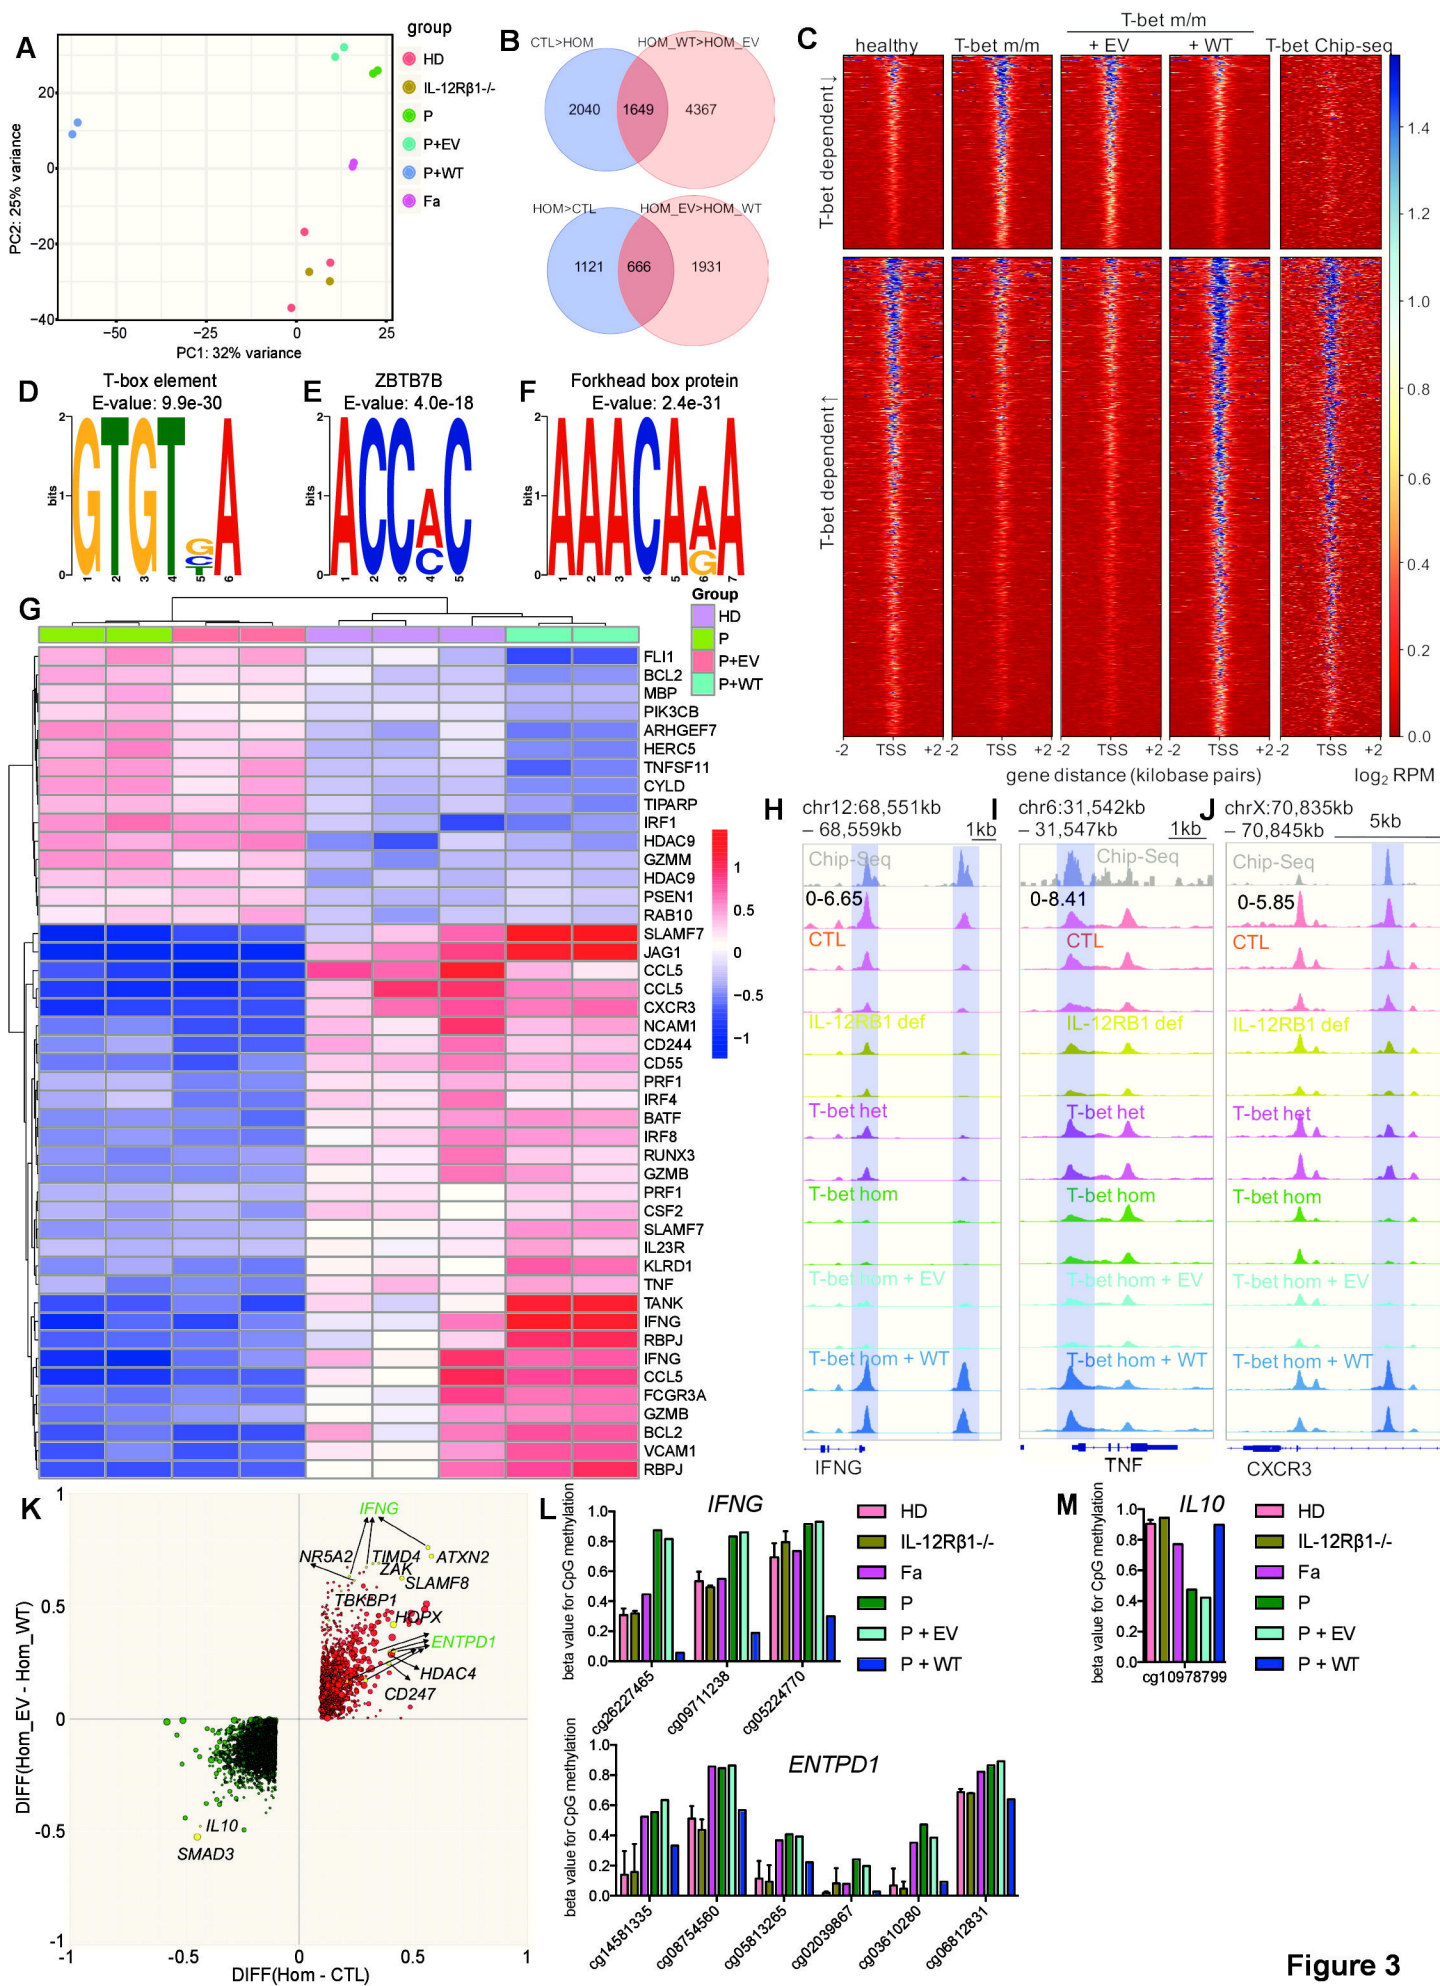

Figure 3

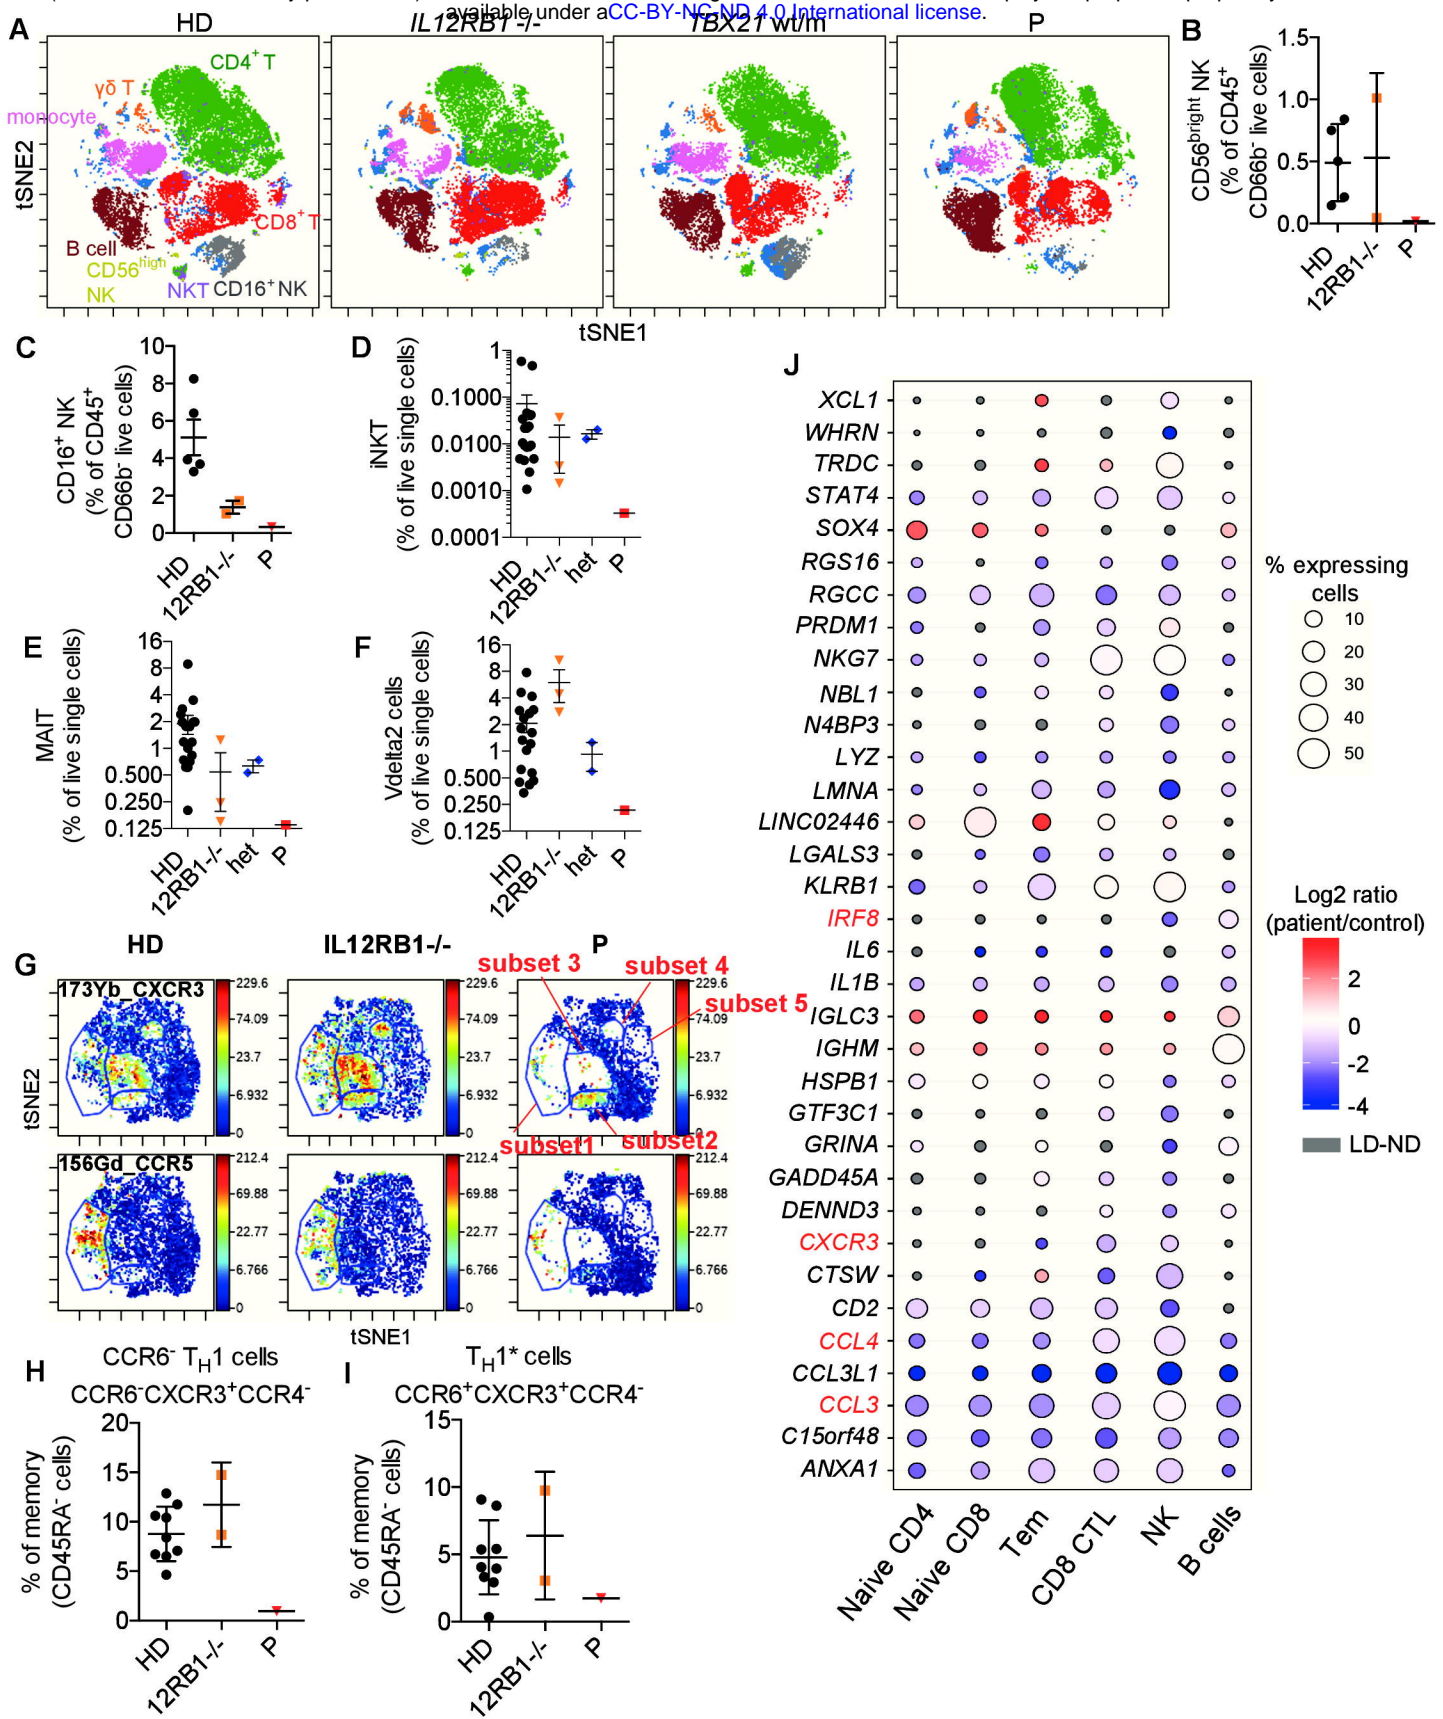

Figure 4



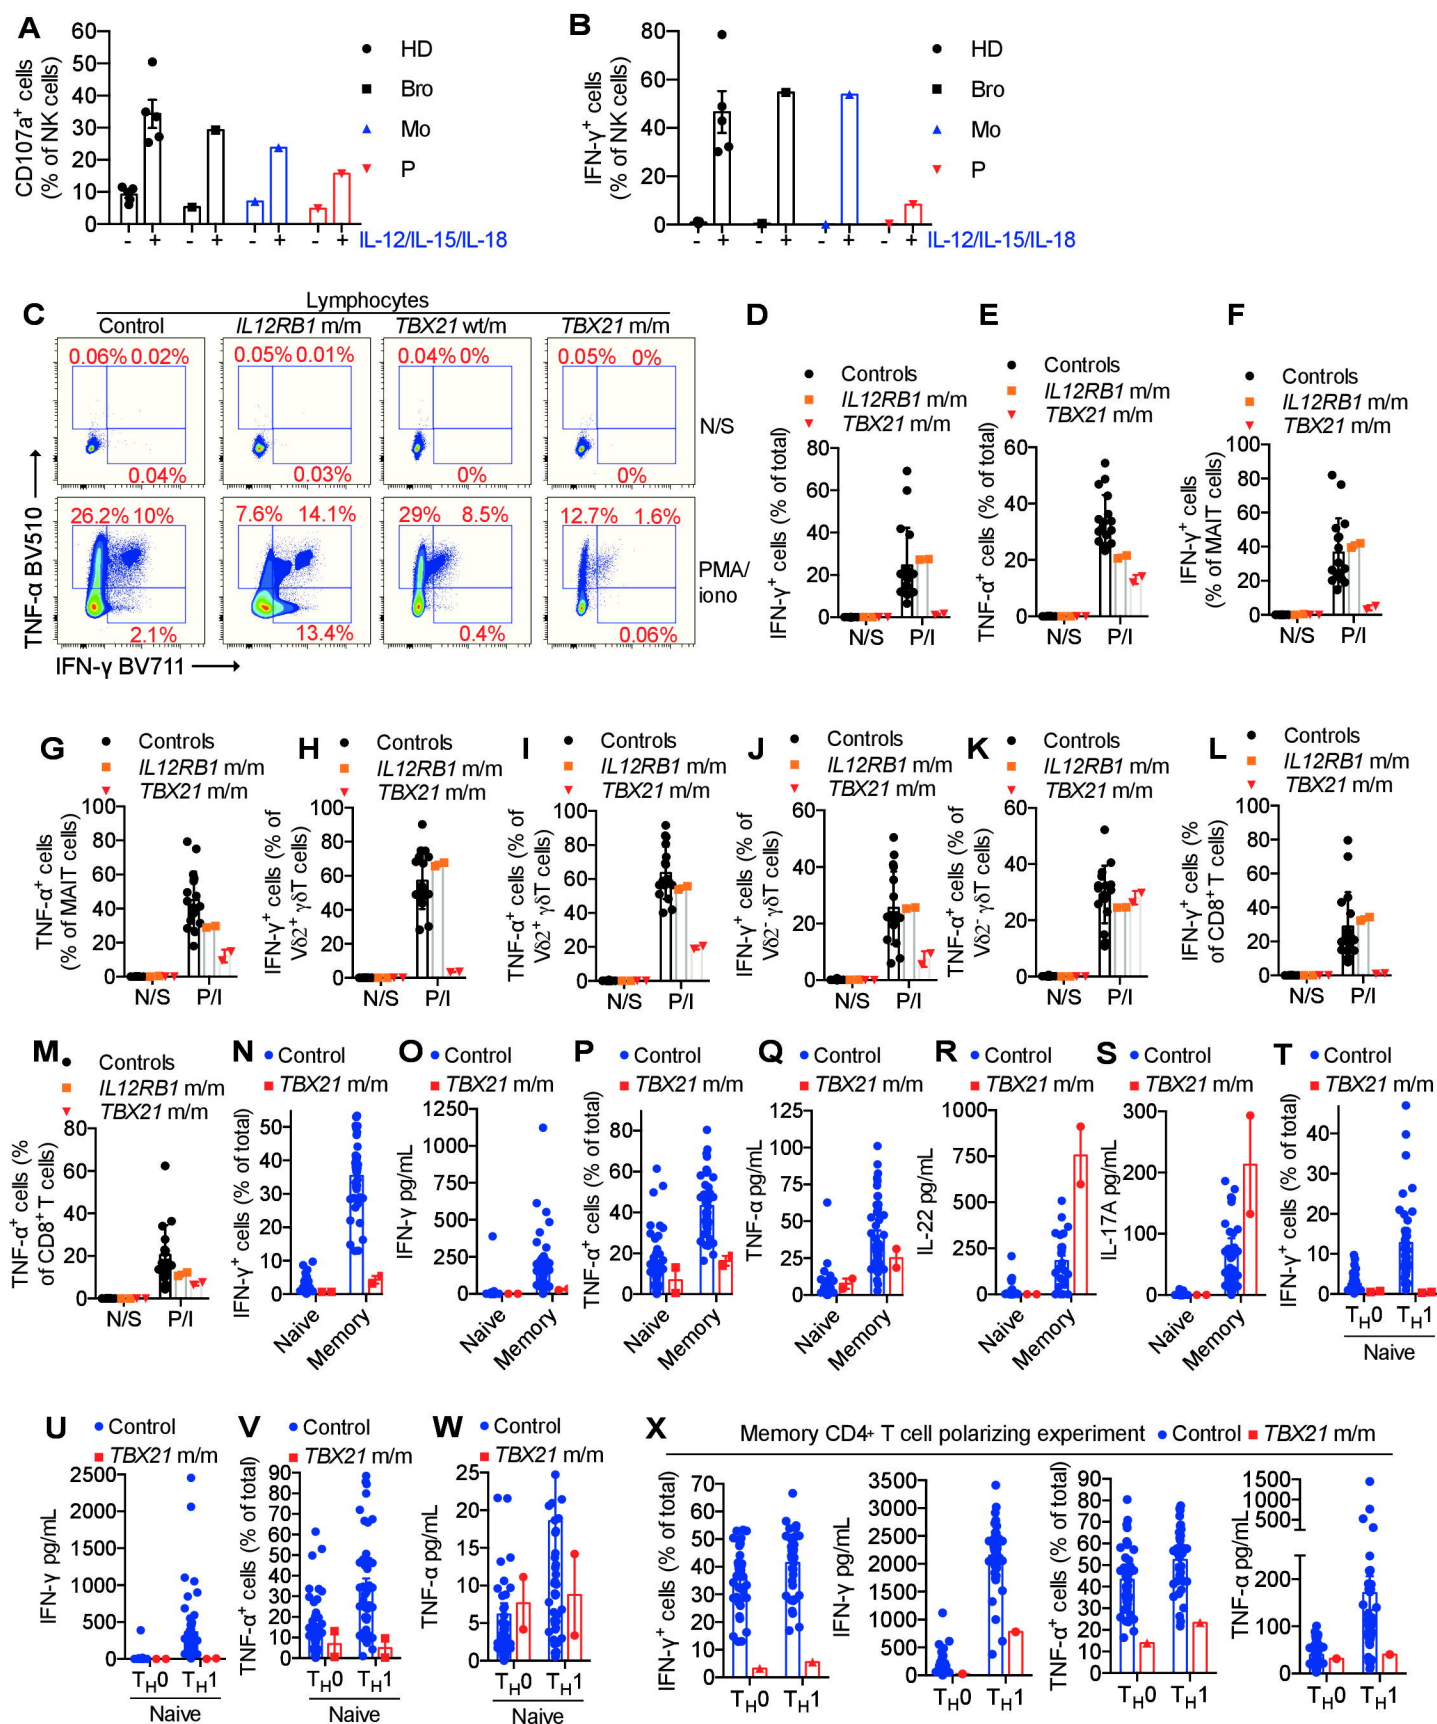

Figure 5

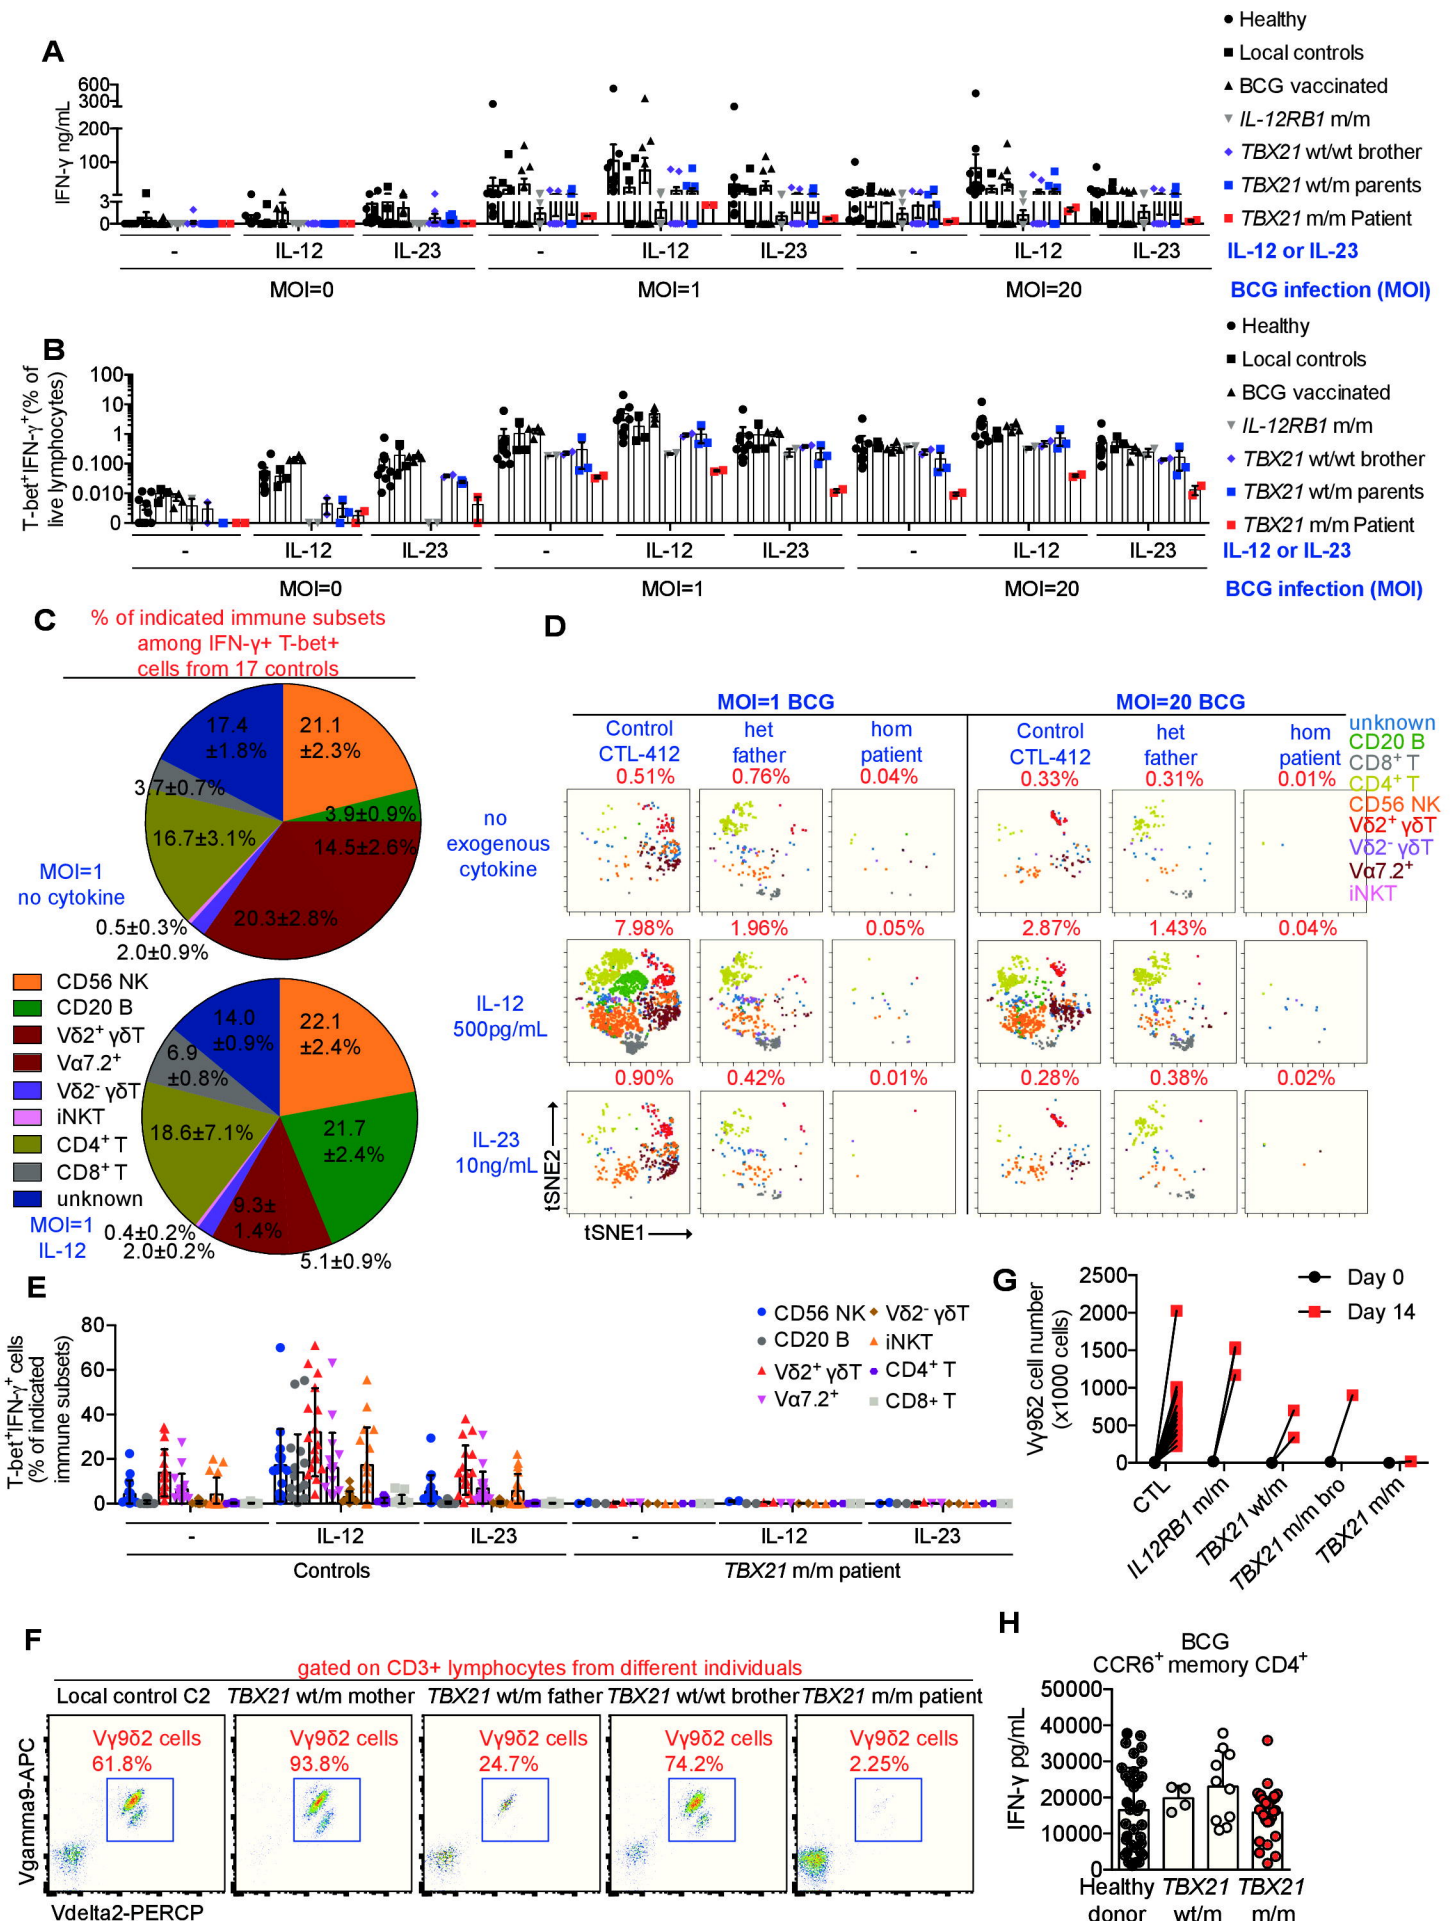

Figure 6
